# Supplementary material
Source: Royal Society of Chemistry journal article supplement (doi:10.1039/d6ta02753a)
Supplement: d6ta02753a1.pdf [file d6ta02753a1.pdf]

# Reversible luminescence detection of dihalogenomethanes in a 3D CuI coordination polymer assembled by a thioether-functionalized POSS ligand

Lydie Viau,<sup>a\*</sup> Abhinav Raghuvanshi,<sup>b\*</sup> Paul-Erik Schneider,<sup>c</sup> Carsten Strohmann,<sup>c\*</sup> Stéphanie Beffy,<sup>a</sup> Sébastien Clément<sup>d</sup> Ahmad Mehdi<sup>d</sup> and Michael Knorr<sup>a\*</sup>

<sup>a</sup> *Université Marie et Louis Pasteur, CNRS, Institut UTINAM (UMR 6213), F-25000 Besançon, France*

<sup>b</sup> *Department of Chemistry, Indian Institute of Technology Indore, Simrol, Indore, Madhya Pradesh, 453552, India.*

<sup>c</sup> *Anorganische Chemie, Technische Universität Dortmund, Otto-Hahn-Straße 6, 44227 Dortmund, Germany*

<sup>d</sup> *ICGM, Université de Montpellier, CNRS, ENSCM, Montpellier, France*

## Table of contents

|                                                                                                                                                                                                                                          |    |
|------------------------------------------------------------------------------------------------------------------------------------------------------------------------------------------------------------------------------------------|----|
| <b>Table S1.</b> Selected bond distances (Å) and angles (°) for <b>L</b> . ....                                                                                                                                                          | 3  |
| <b>Table S2.</b> Porosity parameters calculated using the Pore Analyser Tool (in Mercury) for <b>CP1</b> and <b>CP1.CH<sub>2</sub>Cl<sub>2</sub></b> . ....                                                                              | 7  |
| <b>Table S3.</b> Comparison of geometrical parameters for the hydrogen-bonding interactions in <b>CP1</b> , <b>CP1.CH<sub>2</sub>Cl<sub>2</sub></b> . ....                                                                               | 14 |
| <b>Table S4.</b> Crystal data, data collection, and structure refinement for <b>L</b> and <b>CP2</b> at 100K. ....                                                                                                                       | 15 |
| <b>Table S5.</b> Crystal data, data collection, and structure refinement for <b>CP1</b> at 100-300K. ....                                                                                                                                | 16 |
| <b>Table S6.</b> Crystal data, data collection, and structure refinement for <b>CP1.CH<sub>2</sub>Cl<sub>2</sub></b> at 100-250K and <b>CP1.CH<sub>2</sub>Br<sub>2</sub></b> at 100K. ....                                               | 17 |
| <b>Table S7.</b> Evolution of the Cu–Cu distances (Å), volumes of Cu <sub>4</sub> tetrahedrons (Å <sup>3</sup> ) and volumes of the unit cells (Å <sup>3</sup> ) with temperature (K) for <b>CP1</b> . ....                              | 18 |
| <b>Table S8.</b> Evolution of the Cu–Cu distances (Å), volumes of Cu <sub>4</sub> tetrahedrons (Å <sup>3</sup> ) and volumes of the unit cells (Å <sup>3</sup> ) with temperature (K) for <b>CP1.CH<sub>2</sub>Cl<sub>2</sub></b> . .... | 18 |
| <br>                                                                                                                                                                                                                                     |    |
| <b>Figure S1.</b> <sup>1</sup> H NMR spectrum of <b>L</b> in CDCl <sub>3</sub> . ....                                                                                                                                                    | 1  |
| <b>Figure S2.</b> <sup>13</sup> C { <sup>1</sup> H} NMR spectrum of <b>L</b> in CDCl <sub>3</sub> . ....                                                                                                                                 | 1  |
| <b>Figure S3.</b> <sup>29</sup> Si { <sup>1</sup> H} NMR spectrum of <b>L</b> in CDCl <sub>3</sub> . ....                                                                                                                                | 2  |
| <b>Figure S4.</b> ATR-IR spectrum of <b>L</b> . ....                                                                                                                                                                                     | 2  |
| <b>Figure S5.</b> Molecular structure of <b>L</b> . The H atoms are omitted for clarity. ....                                                                                                                                            | 3  |
| <b>Figure S6.</b> View of two interconnected POSS cores of <b>CP1</b> forming 22-membered macrocycles. All H atoms and <i>t</i> -Bu groups are omitted for clarity. Red and blue arrows indicate centroid-to-centroid separations. ....  | 4  |
| <b>Figure S7.</b> View of two interconnected POSS cores of <b>CP2</b> forming 22-membered macrocycles. All H atoms and <i>t</i> -Bu groups are omitted for clarity. ....                                                                 | 5  |
| <b>Figure S8.</b> Experimental and simulated PXRD of <b>CP1 [LCu<sub>8</sub>I<sub>8</sub>]<sub>n</sub></b> . ....                                                                                                                        | 6  |
| <b>Figure S9.</b> Simulated PXRD of <b>CP2 [LCu<sub>5</sub>I<sub>5</sub>]<sub>n</sub></b> and experimental PXRD of <b>CP1</b> after heating in refluxing acetonitrile. ....                                                              | 6  |
| <b>Figure S10.</b> BET Surface Area Plot of <b>CP1</b> . ....                                                                                                                                                                            | 7  |
| <b>Figure S11.</b> Structural voids visualized in <b>CP1</b> in the <i>ab</i> plane. The green void contact surfaces were plotted at 1.6 Å probe radius with a grid spacing of 0.3 Å in Mercury. ....                                    | 8  |
| <b>Figure S12.</b> Structural voids visualized in <b>CP1</b> in the <i>ac</i> plane. The green void contact surfaces were plotted at 1.6 Å probe radius with a grid spacing of 0.3 Å in Mercury. ....                                    | 8  |
| <b>Figure S13.</b> Solid-state emission of <b>CP1</b> after exposition to various solvent vapors for 20 min ( $\lambda_{\text{ex}} = 330$ nm). ....                                                                                      | 9  |
| <b>Figure S14.</b> Solid-state emission (blue) and excitation (red) spectra of <b>CP1.CH<sub>2</sub>Br<sub>2</sub></b> at 298 K and 77 K. ....                                                                                           | 9  |
| <b>Figure S15.</b> View of the POSS core of <b>CP1.CH<sub>2</sub>Cl<sub>2</sub></b> surrounded by six cubane-shaped Cu <sub>4</sub> I <sub>4</sub> S <sub>4</sub> clusters. ....                                                         | 10 |
| <b>Figure S16.</b> View of the POSS core of <b>CP1.CH<sub>2</sub>Br<sub>2</sub></b> surrounded by six cubane-shaped Cu <sub>4</sub> I <sub>4</sub> S <sub>4</sub> clusters. ....                                                         | 11 |
| <b>Figure S17.</b> Hydrogen bonding in <b>CP1</b> . ....                                                                                                                                                                                 | 12 |
| <b>Figure S18.</b> Hydrogen bonding in <b>CP1.CH<sub>2</sub>Cl<sub>2</sub></b> . ....                                                                                                                                                    | 13 |

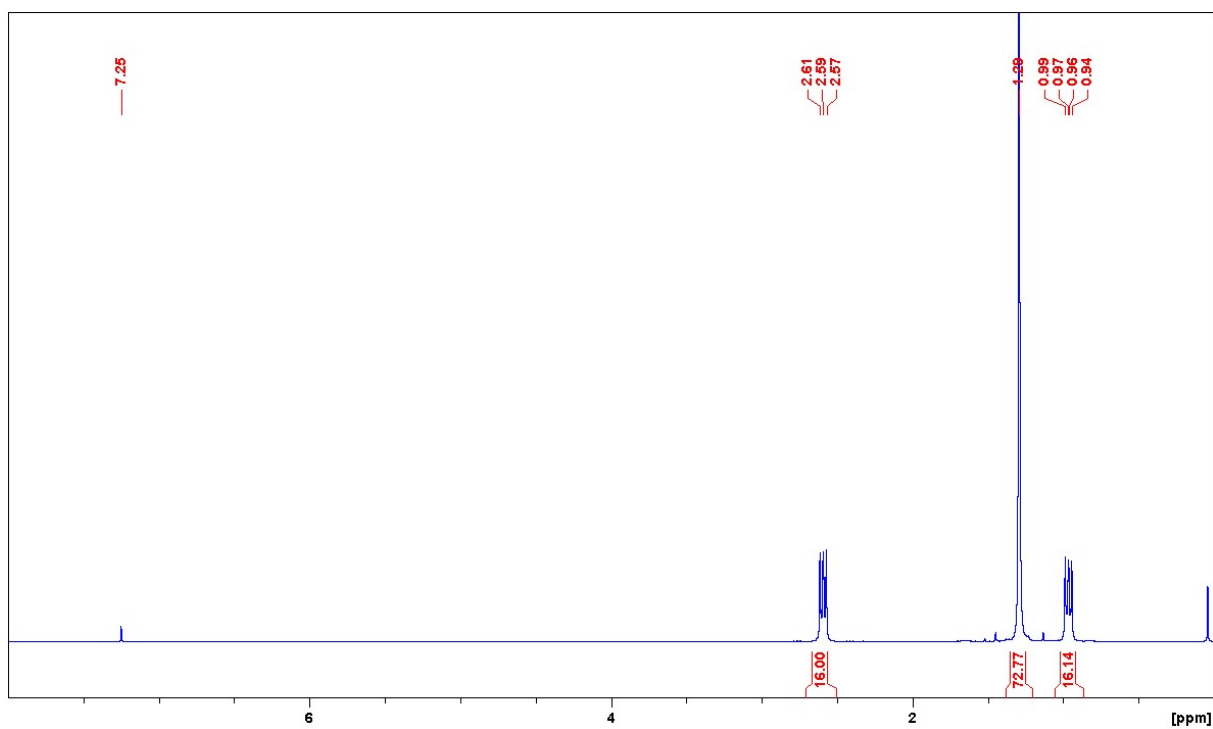

Figure S1.  $^1\text{H}$  NMR spectrum of **L** in  $\text{CDCl}_3$ .

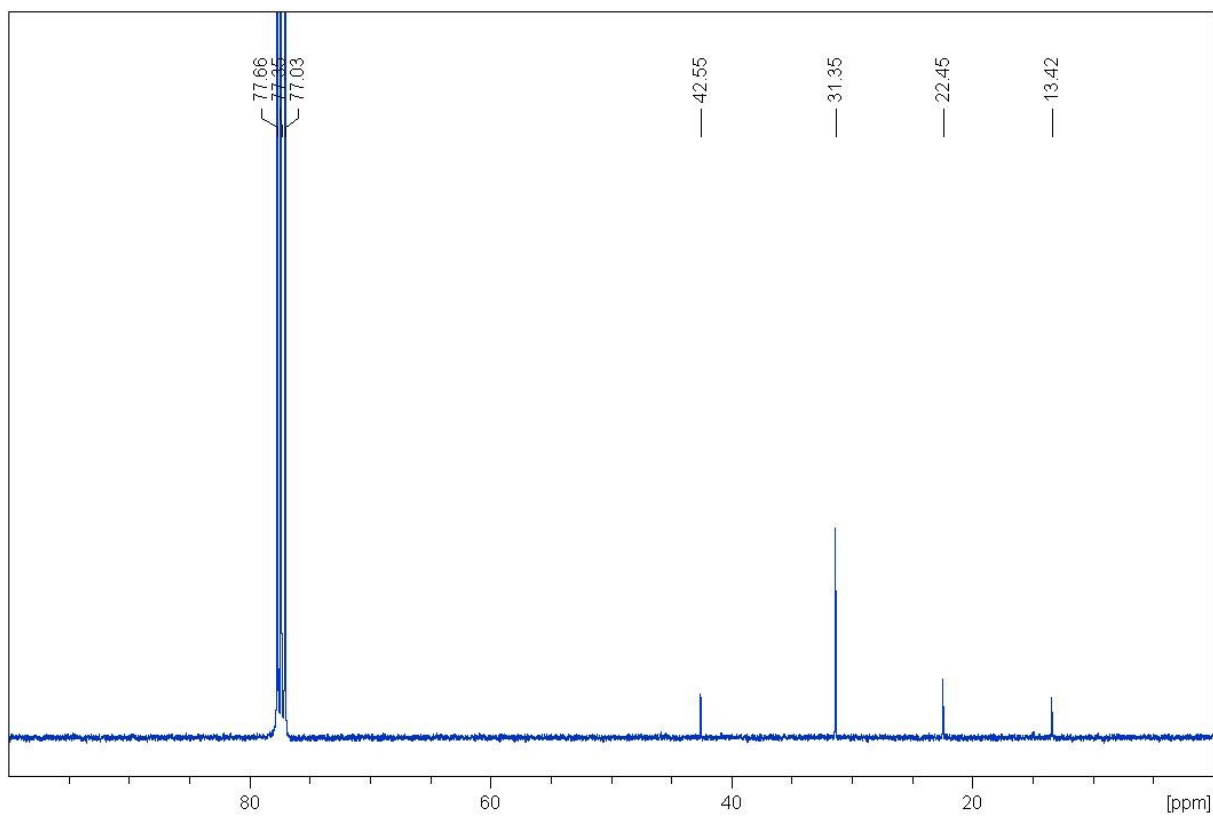

Figure S2.  $^{13}\text{C}\{^1\text{H}\}$  NMR spectrum of **L** in  $\text{CDCl}_3$ .

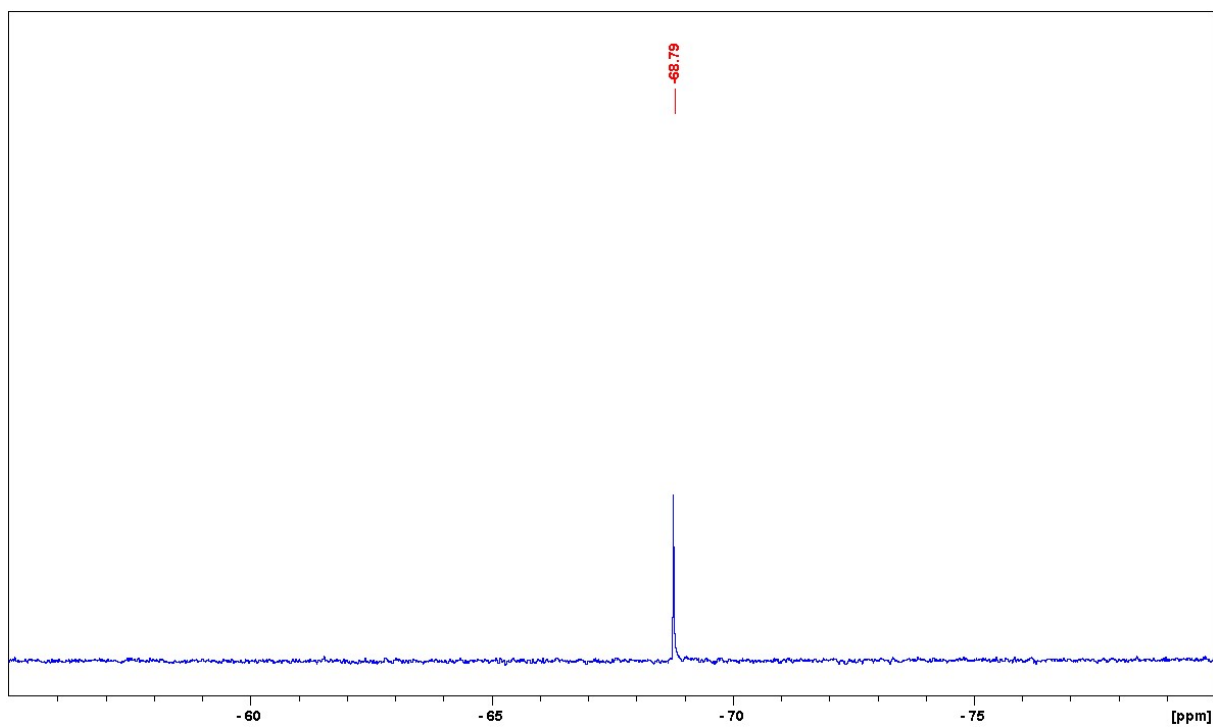

**Figure S3.**  $^{29}\text{Si}\{^1\text{H}\}$  NMR spectrum of **L** in  $\text{CDCl}_3$ .

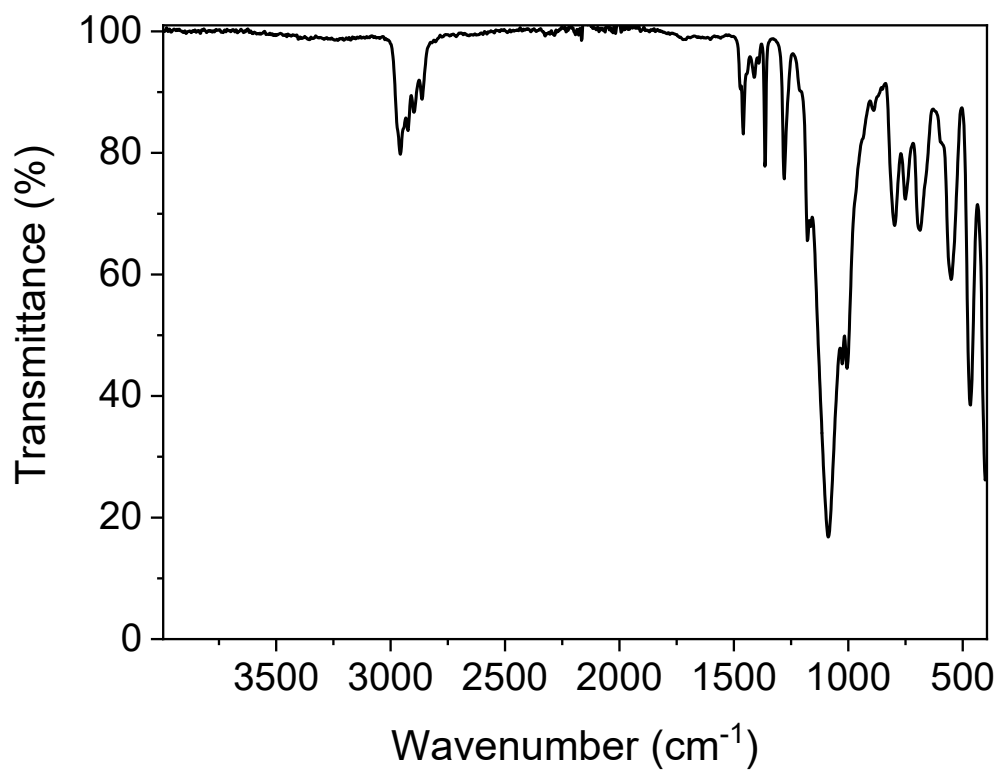

**Figure S4.** ATR-IR spectrum of **L**.

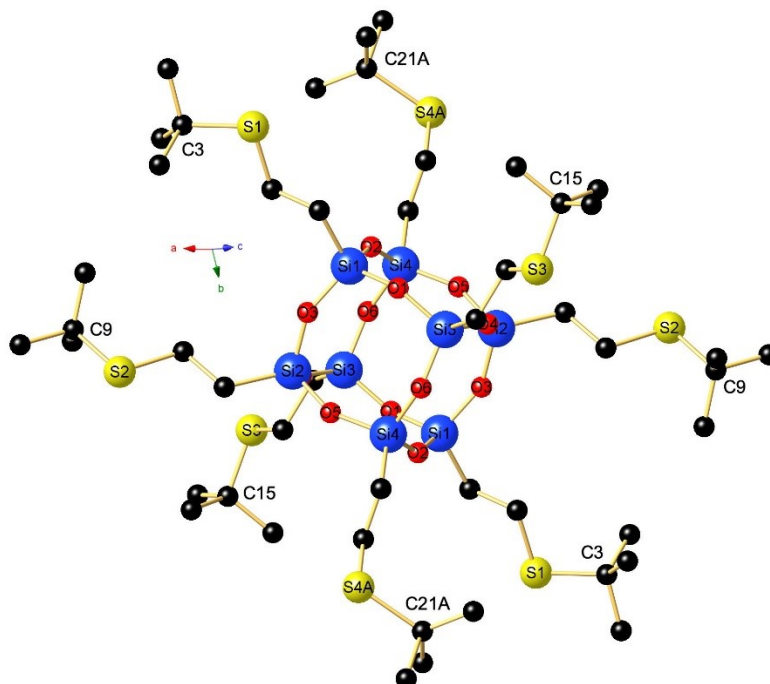

**Figure S5.** Molecular structure of **L**. The H atoms are omitted for clarity.

Selected bond lengths (Å) and angles (°): Si1–C1 1.841(3), Si2–C7 1.843(3), Si3–C13 1.845(3), Si4–C19 1.838(3), S1–C2 1.808(3), S2–C8 1.809(3), S3–C14 1.815(3), S4A–C20A 1.757(9), Si1–O1 1.6150(19), Si1–O2 1.6178(18), Si1–O3 1.6150(19), Si2–O3 1.6162(18), Si2–O4 1.6178(19), Si2–O5 1.614(2), Si3–O1<sup>1</sup> 1.6122(19), Si3–O4 1.6141(19); Si3–O6<sup>1</sup> 1.6121(19); Si1–O1–Si3<sup>1</sup> 151.47(13), Si1–O2–Si4<sup>1</sup> 143.97(12), Si2–O3–Si1 151.63(13), Si2–O4–Si3 143.92(12), Si2–O5–Si4 151.73(13), Si3<sup>1</sup>–O6–Si4 151.70(13), C2–S1–C3 105.1(2), C8–S2–C9 104.24(14), C14–S3–C15 104.73(16), C20A–S4A–C21A 108.4(7). Symmetry transformations used to generate equivalent atoms: <sup>1</sup>-x, 1-y, 1-z.

**Table S1.** Selected bond distances (Å) and angles (°) for **L**.

| Mean Si-O     |                           | Mean Si-O-Si  |                           | O-Si-O        |                           |
|---------------|---------------------------|---------------|---------------------------|---------------|---------------------------|
| average value | range of values           | average value | range of values           | average value | range of values           |
| 1.6141        | 1.6076(19)-<br>1.6217(18) | 149.07        | 143.92(12)-<br>151.73(13) | 109.03        | 108.50(10)-<br>109.52(11) |

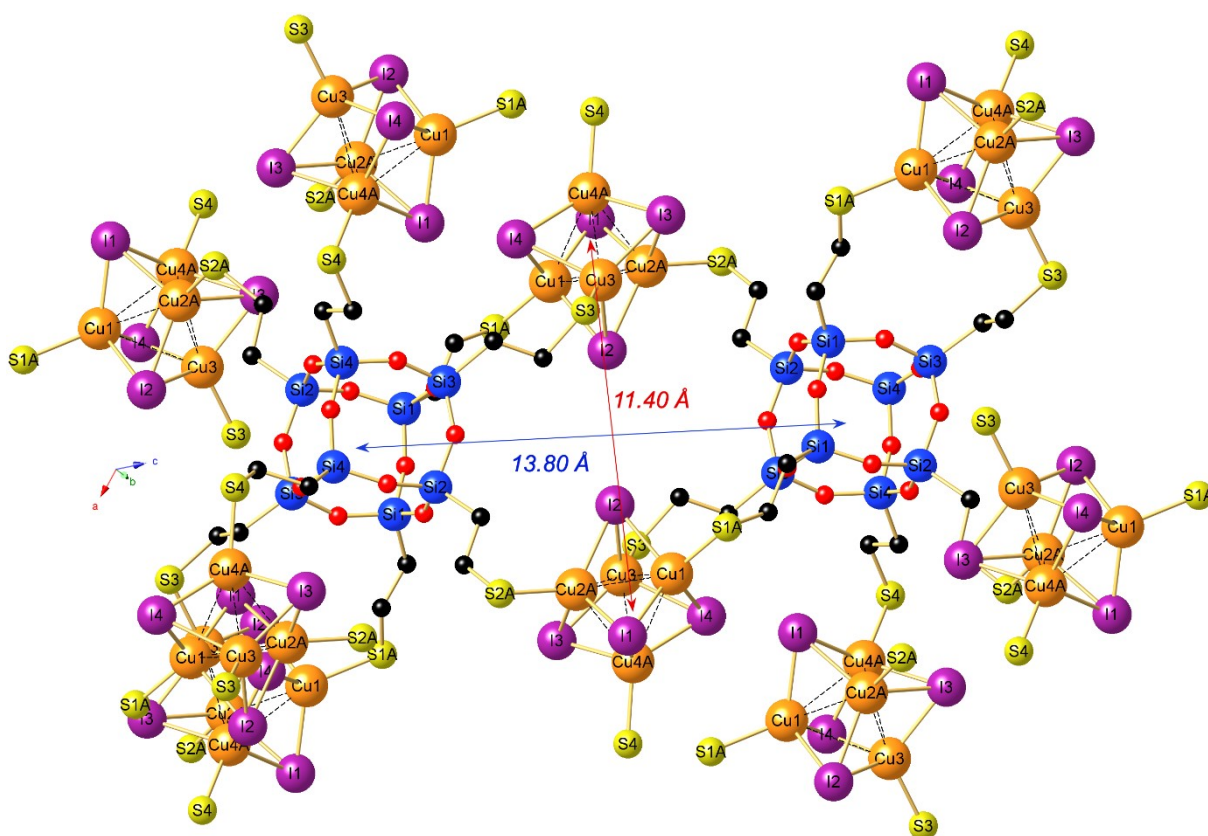

**Figure S6.** View of two interconnected POSS cores of **CP1** forming 22-membered macrocycles. All H atoms and *t*-Bu groups are omitted for clarity. Red and blue arrows indicate centroid-to-centroid separations.

Selected bond lengths (Å) and angles (°) at 100 K: Cu1–Cu2A<sup>1</sup> 2.7871(18), Cu1–Cu3<sup>3</sup> 3.171(1), Cu1–Cu4A<sup>2</sup> 3.014(2), Cu2A–Cu3<sup>4</sup> 2.747(2), Cu2A–Cu4A<sup>8</sup> 2.750(3), Cu3–Cu4A<sup>5</sup> 2.963(2), Cu1–S1A 2.3319(15), Cu2A–S2A 2.293(3), Cu3–S3 2.3357(15), Cu4A–S4A 2.315(4), Cu1–I1 2.6055(11), Cu1<sup>3</sup>–I2 2.7322(12), Cu1<sup>6</sup>–I4 2.7065(13), Cu2A<sup>1</sup>–I1 2.708(2), Cu2A<sup>4</sup>–I2 2.693(2), Cu2A<sup>4</sup>–I3 2.733(2), Cu3–I2 2.7102(11), Cu3–I3 2.6177(10), Cu3<sup>7</sup>–I4 2.7372(13), Cu4A<sup>2</sup>–I1 2.768(3), Cu4A<sup>5</sup>–I3 2.684(2), Cu4A–I4 2.647(2); Cu1–I1–Cu2A<sup>1</sup> 63.24(5), Cu1–I1–Cu4A<sup>2</sup> 68.16(5), Cu1<sup>4</sup>–I2–Cu2A<sup>3</sup> 61.82(4), Cu1<sup>4</sup>–I2–Cu3 71.28(3), Cu1<sup>7</sup>–I4–Cu3<sup>6</sup> 71.26(3), Cu1<sup>7</sup>–I4–Cu4A 68.51(5), Cu2A<sup>1</sup>–I1–Cu4A<sup>2</sup> 60.28(6), Cu2A<sup>3</sup>–I2–Cu3 61.12(5), Cu2A<sup>3</sup>–I3–Cu3 61.75(5), Cu3–I3–Cu2A<sup>3</sup> 61.75(5), Cu3<sup>6</sup>–I4–Cu1<sup>7</sup> 71.26(3), Cu4A<sup>5</sup>–I3–Cu2A<sup>3</sup> 61.02(6), Cu4A<sup>5</sup>–I3–Cu3 67.941(5), Cu4A–I4–Cu1<sup>7</sup> 65.0(5), S1A–Cu1–I1 116.96(4), S1A–Cu1–I2<sup>4</sup> 99.68(5), S1A–Cu1–I4<sup>2</sup> 113.72(5), S2A–Cu2A–I1<sup>8</sup> 105.27(13), S2A–Cu2A–I2<sup>3</sup> 119.54(15), S2A–Cu2A–I3<sup>3</sup> 92.59(10), S3–Cu3–I2 110.67(4), S3–Cu3–I3 116.37(4), S3–Cu3–I4<sup>5</sup> 101.34(4), S4A–Cu4–I1<sup>7</sup> 108.06(12), S4A–Cu4–I3<sup>6</sup> 100.49(11), S4A–Cu4A–I4 120.29(11). Symmetry transformations used to generate equivalent atoms: <sup>1</sup>+x, 1–y, ½+z; <sup>2</sup>–1/2+x, ½+y, +z; <sup>3</sup>1–x, 1–y, 1–z; <sup>4</sup>1–x, +y, 3/2–z; <sup>5</sup>3/2–x, ½+y, 3/2–z; <sup>6</sup>3/2–x, –1/2+y, 3/2–z; <sup>7</sup>1/2+x, –1/2+y, +z; <sup>8</sup>+x, 1–y, –1/2+z.

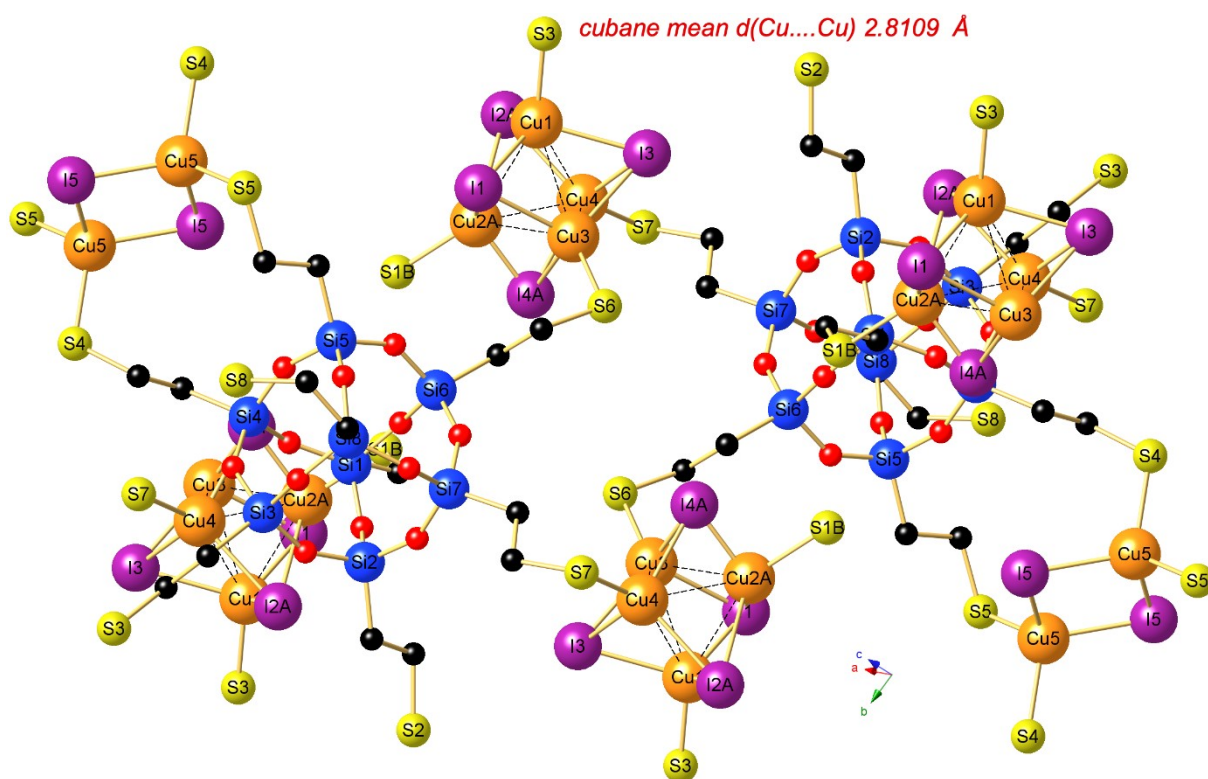

**Figure S7.** View of two interconnected POSS cores of CP2 forming 22-membered macrocycles. All H atoms and *t*-Bu groups are omitted for clarity.

Selected bond lengths (Å) and angles (°) at 100 K: Cu1–Cu2A<sup>4</sup> 2.868(3), Cu1–Cu3<sup>3</sup> 2.8652(12), Cu1–Cu4<sup>5</sup> 2.8984(17), Cu2A<sup>7</sup>–Cu3 2.743(3), Cu2A–Cu4 2.755(3), Cu3–Cu4<sup>2</sup> 2.7161(12), Cu1–S3 2.3172(17), Cu2A–S1B 2.313(3), Cu3–S6 2.3236(16), Cu4–S7 2.3167(17), Cu5–S4 2.237(16), Cu5–S5<sup>6</sup> 2.3322(17), Cu1–I1 2.6385(10), Cu1–I2A 2.507(16), Cu1<sup>1</sup>–I3 2.6851(11), Cu2A<sup>4</sup>–I1 2.669(3), Cu3–I3 2.6792(10), Cu3<sup>3</sup>–I1 2.7102(10), Cu3–I4A 2.672(7), Cu3<sup>3</sup>–I1 2.7102(10), Cu4<sup>2</sup>–I3 2.7153(12), Cu4<sup>5</sup>–I2A 2.746(11), Cu4<sup>2</sup>–I4A 2.587(7), Cu5–I5 2.6322(10), Cu5<sup>6</sup>–I5 2.6384(13); Cu1–I1–Cu2A<sup>4</sup> 65.42(7), Cu1–I1–Cu3<sup>3</sup> 64.77(3), Cu1<sup>1</sup>–I2A–Cu4<sup>5</sup> 66.8(4), Cu1<sup>1</sup>–I3–Cu4<sup>2</sup> 64.91(4), Cu3–I3–Cu1<sup>1</sup> 64.57(2), Cu3–I3–Cu4<sup>2</sup> 60.46(2), Cu4<sup>2</sup>–I4A–Cu3 62.17(6), Cu5–I5–Cu5<sup>6</sup> 83.09(4), I5–Cu5–I5<sup>6</sup> 96.91(4), S3–Cu1–I1 107.19(5), S3–Cu1–I2A 111.2(6), S3–Cu1–I3<sup>3</sup> 99.84(5), S1B–Cu2A–I1<sup>4</sup> 118.10(13), S1B–Cu2A–I2A<sup>4</sup> 116.10(13), S6–Cu3–I3 116.67(4), S6–Cu3–I1<sup>1</sup> 107.74(4), S6–Cu3–I4A 104.3(5), S7–Cu4–I3<sup>2</sup> 107.68(4), S7–Cu4–I2A<sup>5</sup> 120.21(6), S7–Cu4–I4A<sup>2</sup> 101.3(5), S4–Cu5–I5 109.09(5), S4–Cu5–I5<sup>6</sup> 119.72(5), S5<sup>6</sup>–Cu5–I5 121.51(4), S5<sup>6</sup>–Cu5–I5<sup>6</sup> 108.34(4), S4–Cu5–S5<sup>6</sup> 102.50(5). Symmetry transformations used to generate equivalent atoms: <sup>1</sup>+x, +y, +z; <sup>2</sup>1-x, 1-y, 1-z; <sup>3</sup>+x, -1+y, +z; <sup>4</sup>-x, -y, -z; <sup>5</sup>1-x, -y, 1-z, <sup>6</sup>-x, 1-y, -z, <sup>7</sup>-x, 1-y, 1-z, <sup>8</sup>1+x, +y, +z.

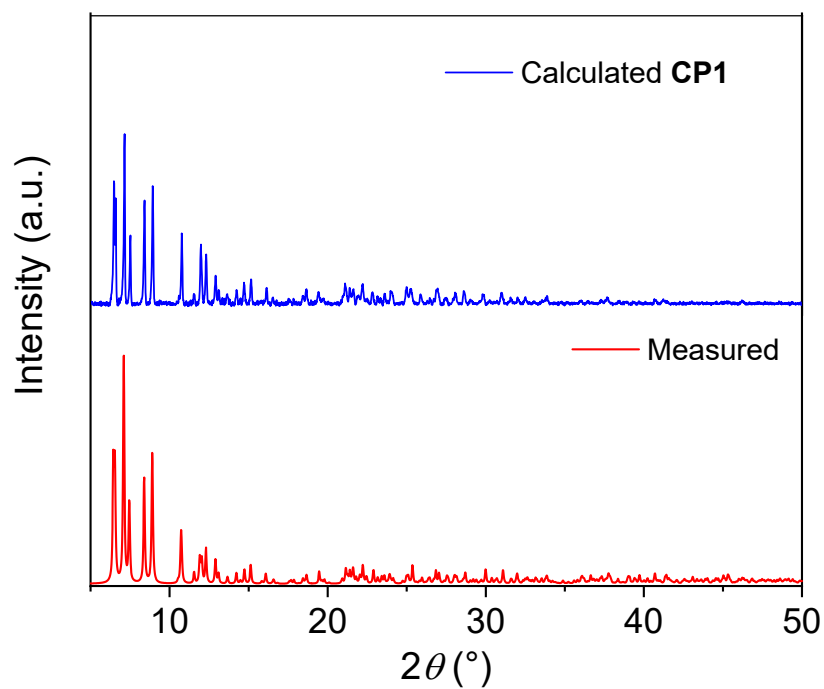

**Figure S8.** Experimental and simulated PXR D of CP1 [ $\text{LCu}_8\text{I}_8$ ] $_n$ .

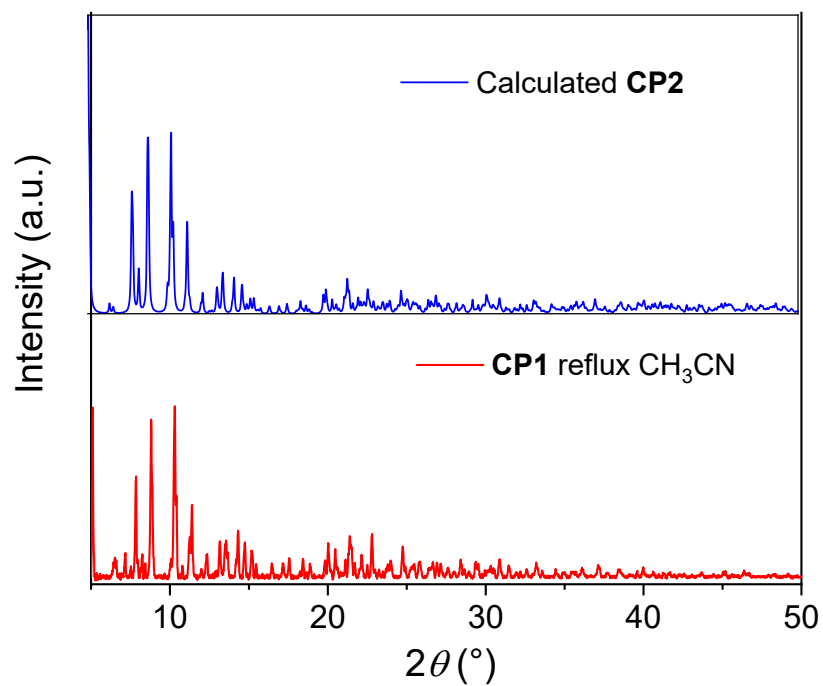

**Figure S9.** Simulated PXR D of CP2 [ $\text{LCu}_5\text{I}_5$ ] $_n$  and experimental PXR D of CP1 after heating in refluxing acetonitrile.

**Table S2.** Porosity parameters calculated using the Pore Analyser Tool (in Mercury) for **CP1** and **CP1.CH<sub>2</sub>Cl<sub>2</sub>**.

| Compounds                                  | CP1       | CP1.CH <sub>2</sub> Cl <sub>2</sub> <sup>a</sup> |                                 |
|--------------------------------------------|-----------|--------------------------------------------------|---------------------------------|
| Parameter                                  |           |                                                  | Unit                            |
| System Volume                              | 10270.240 | 10444.792                                        | Å <sup>3</sup>                  |
| System Mass                                | 11496.414 | 11512.541                                        | g/mol                           |
| System Density                             | 1.859     | 1.830                                            | g/cm <sup>3</sup>               |
| Total surface area                         | 2.79      | 20.30                                            | Å <sup>2</sup>                  |
| Total surface area per volume              | 2.72      | 19.44                                            | m <sup>2</sup> /cm <sup>3</sup> |
| Total surface area per mass                | 1.46      | 10.62                                            | m <sup>2</sup> /g               |
| Network-accessible surface area            | 0.00      | 0.00                                             | Å <sup>2</sup>                  |
| Network-accessible surface area per volume | 0.00      | 0.00                                             | m <sup>2</sup> /cm <sup>3</sup> |
| Network-accessible surface area per mass   | 0.00      | 0.00                                             | m <sup>2</sup> /g               |
| Total helium volume                        | 2112.671  | 2337.993                                         | Å <sup>3</sup>                  |
| Total helium volume                        | 0.111     | 0.122                                            | cm <sup>3</sup> /g              |
| Total geometric volume                     | 4061.295  | 4198.989                                         | Å <sup>3</sup>                  |
| Total geometric volume                     | 0.213     | 0.220                                            | cm <sup>3</sup> /g              |
| Network-accessible helium volume           | 2112.381  | 2337.815                                         | Å <sup>3</sup>                  |
| Network-accessible helium volume           | 0.111     | 0.122                                            | cm <sup>3</sup> /g              |
| Network-accessible geometric volume        | 4057.420  | 4195.277                                         | Å <sup>3</sup>                  |
| Network-accessible geometric volume        | 0.213     | 0.219                                            | cm <sup>3</sup> /g              |
| Pore limiting diameter                     | 3.13      | 3.30                                             | Å                               |
| Maximum pore diameter                      | 4.06      | 4.28                                             | Å                               |
| Number of percolated dimensions            | 1         | 1                                                | Dimension                       |

<sup>a</sup> DCM molecules were removed manually

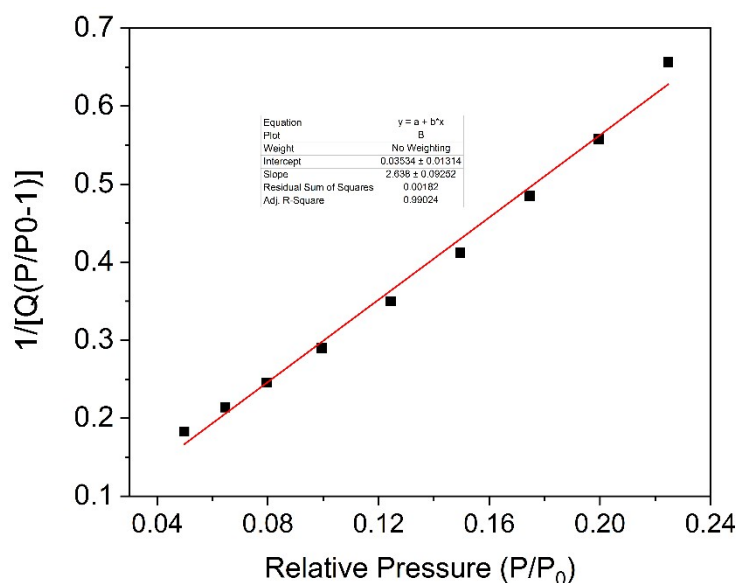

**Figure S10.** BET Surface Area Plot of **CP1**.

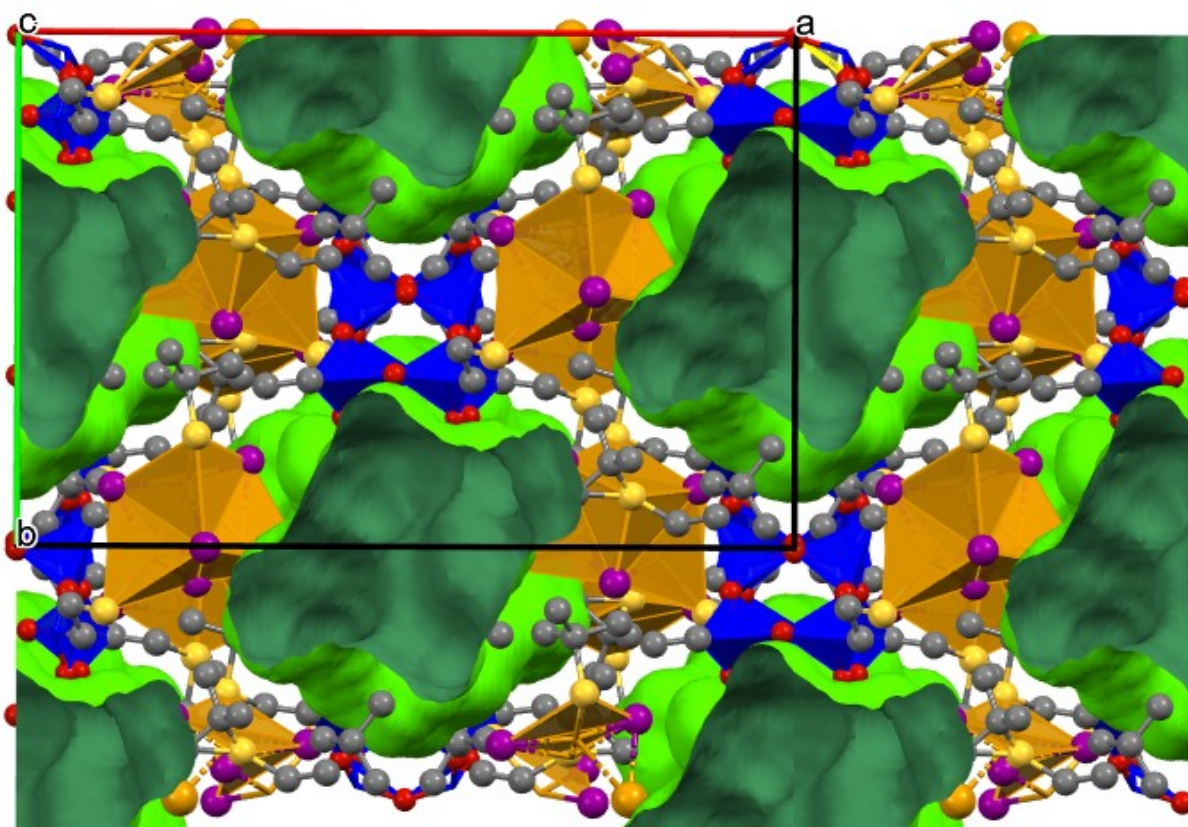

**Figure S11.** Structural voids visualized in CP1 in the *ab* plane. The green void contact surfaces were plotted at 1.6 Å probe radius with a grid spacing of 0.3 Å in Mercury.

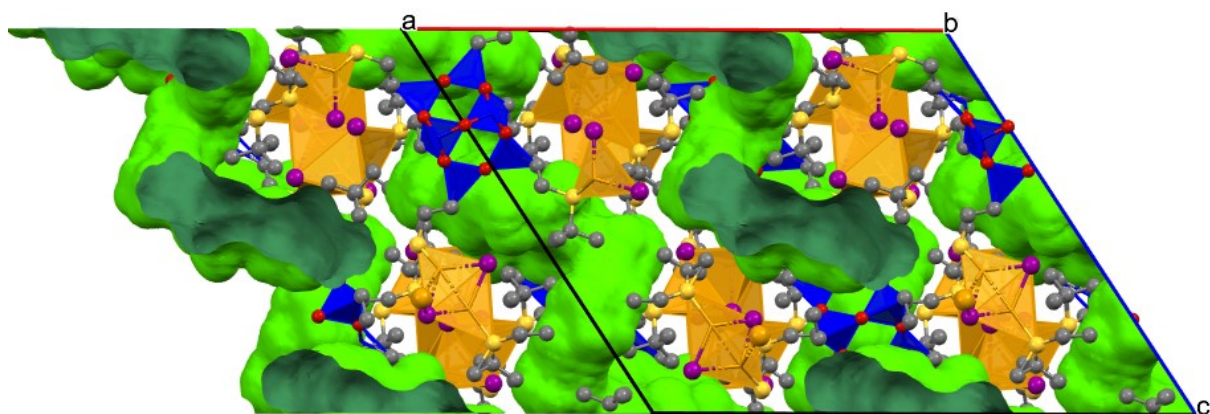

**Figure S12.** Structural voids visualized in CP1 in the *ac* plane. The green void contact surfaces were plotted at 1.6 Å probe radius with a grid spacing of 0.3 Å in Mercury.

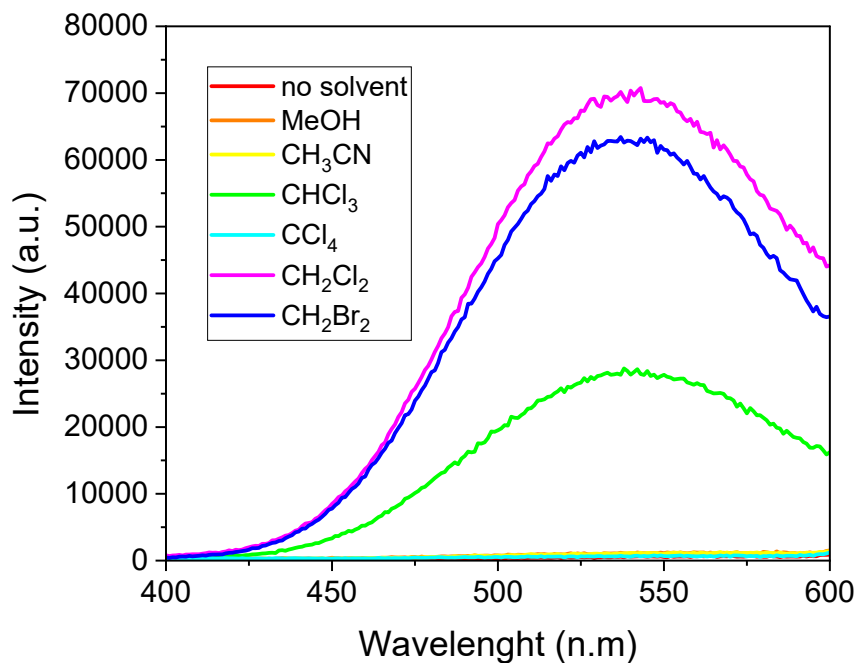

**Figure S13.** Solid-state emission of **CP1** after exposition to various solvent vapors for 20 min ( $\lambda_{\text{ex}} = 330$  nm).

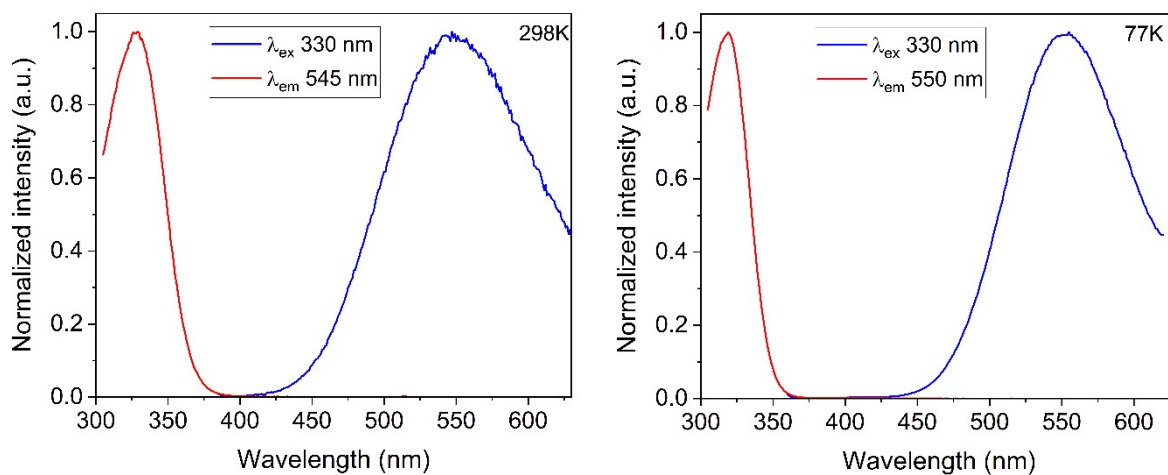

**Figure S14.** Solid-state emission (blue) and excitation (red) spectra of **CP1·CH<sub>2</sub>Br<sub>2</sub>** at 298 K and 77 K.

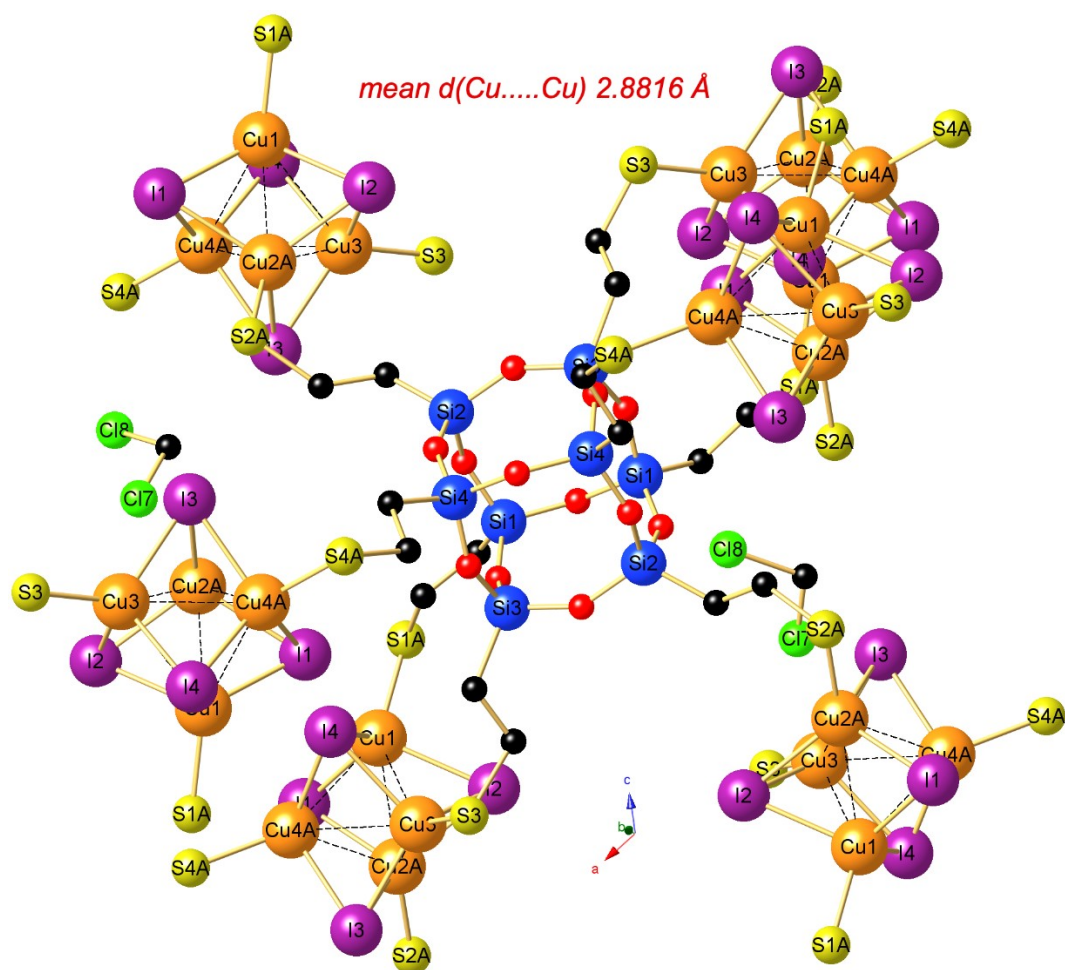

**Figure S15.** View of the POSS core of  $\text{CP1}\cdot\text{CH}_2\text{Cl}_2$  surrounded by six cubane-shaped  $\text{Cu}_4\text{I}_4\text{S}_4$  clusters.

The H atoms are omitted for clarity and only the disordered Cl7-C-Cl8 solvent molecules are shown. Selected bond lengths (Å) and angles ( $^\circ$ ) at 100 K: Cu1–Cu2A<sup>1</sup> 2.760(2), Cu1–Cu3 3.1319(8), Cu1–Cu4A<sup>2</sup> 2.9275(13), Cu2A–Cu3<sup>4</sup> 2.761(3), Cu2A–Cu4A<sup>8</sup> 2.730(3), Cu3–Cu4A<sup>5</sup> 2.9790(16), Cu1–S1A 2.3301(10), Cu2A–S2A 2.260(3), Cu3–S3 2.3378(10), Cu4–S4A 2.301(3), Cu1–I1 2.5954(7), Cu1<sup>3</sup>–I2 2.7087(8), Cu1<sup>6</sup>–I6 2.7022(9), Cu2A<sup>1</sup>–I1 2.715(3), Cu2A<sup>2</sup>–I2 2.7026(12), Cu3–I2 2.7000(7), Cu2A<sup>4</sup>–I3 2.719(2), Cu3–I3 2.6281(7), Cu4A<sup>5</sup>–I3 2.6930(14), Cu1<sup>6</sup>–I4 2.7022(9), Cu3<sup>7</sup>–I4 2.7119(8), Cu4A–I4 2.636(13); Cu1–I1–Cu2A<sup>1</sup> 62.59(5), Cu1–I1–Cu4A<sup>2</sup> 67.05(3), Cu1<sup>4</sup>–I2–Cu2A<sup>3</sup> 61.59(6), Cu1<sup>4</sup>–I2–Cu3 70.772(18), Cu2A<sup>3</sup>–I3–Cu3 62.15(6), Cu2A<sup>3</sup>–I3–Cu4A<sup>5</sup> 60.59(7), Cu3–I3–Cu4A<sup>5</sup> 68.08(3), Cu1<sup>7</sup>–I4–Cu3<sup>6</sup> 70.689(19), Cu1<sup>7</sup>–I4–Cu4A 66.50(3), Cu3<sup>6</sup>–I4–Cu4A 67.68(8), S1A–Cu1–I1 115.54(3), S1A–Cu1–I2<sup>4</sup> 100.26(3), S1A–Cu1–I4<sup>2</sup> 112.88(38), S2A–Cu2A–I1<sup>8</sup> 104.35(13), S2A–Cu2A–I2<sup>3</sup> 121.22(3), S2A–Cu2A–I3<sup>3</sup> 92.64(9), S3–Cu3–I2 110.79(2), S3–Cu3–I3 115.64(2), S3–Cu3–I4<sup>5</sup> 103.28(3), S4A–Cu4A–I1<sup>7</sup> 108.39(8), S4A–Cu4A–I3<sup>6</sup> 98.67(6), S4A–Cu4A–I4 119.69(9). Symmetry transformations used to generate equivalent atoms: <sup>1</sup>+x, 1–y, 1/2+z; <sup>2</sup>–1/2+x, 1/2+y, +z; <sup>3</sup>1–x, +y, 3/2–z; <sup>4</sup>1–x, 1–y, 1–z; <sup>5</sup>3/2–x, 1/2+y, 3/2–z; <sup>6</sup>1/2+x, –1/2+y, +z; <sup>7</sup>3/2–x, –1/2+y, 3/2–z; <sup>8</sup>–1/2+x, 1/2–y, –1/2+z.

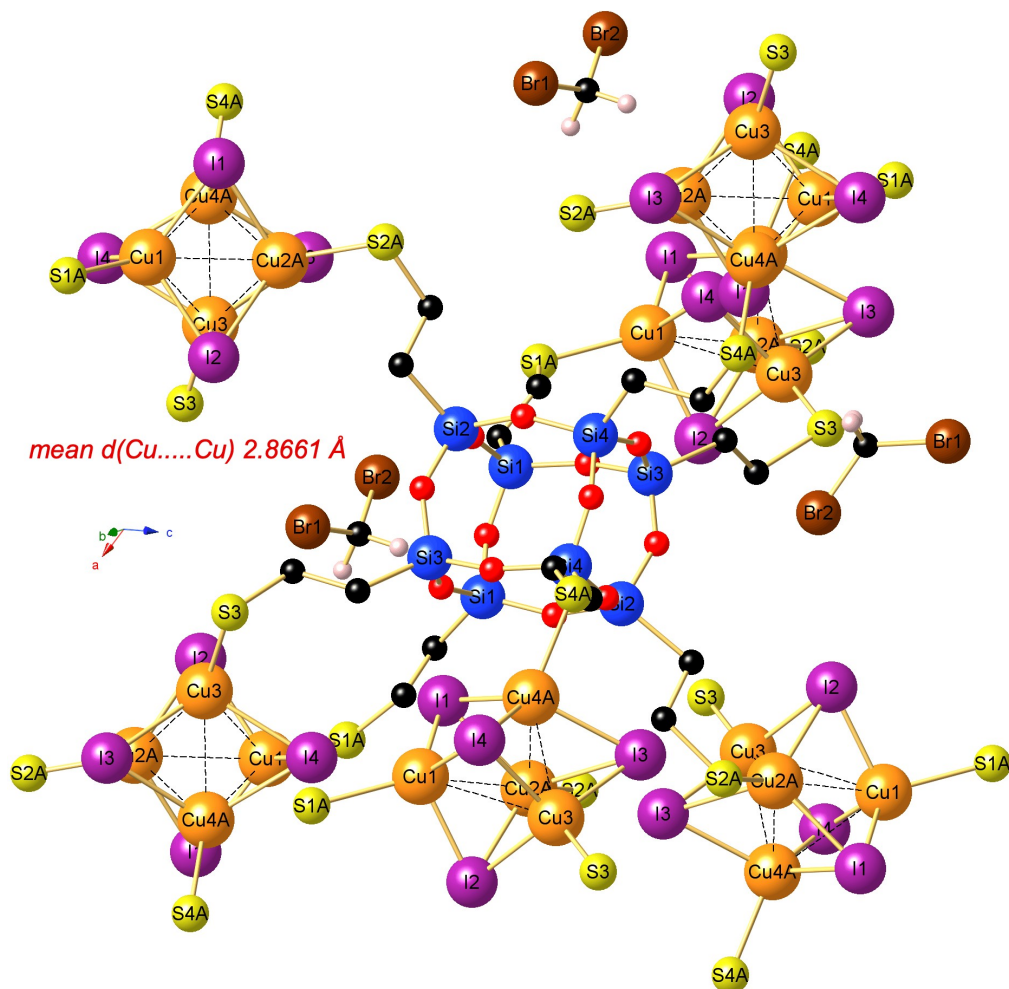

**Figure S16.** View of the POSS core of **CP1.CH<sub>2</sub>Br<sub>2</sub>** surrounded by six cubane-shaped Cu<sub>4</sub>I<sub>4</sub>S<sub>4</sub> clusters.

The H atoms are omitted for clarity and only the disordered Br1-C-Br2 solvent molecules are shown. Selected bond lengths (Å) and angles (°) at 100 K: Cu1–Cu2A<sup>1</sup> 2.927(6), Cu1–Cu3<sup>1</sup> 3.175(2), Cu1–Cu4A<sup>2</sup> 2.934(6), Cu2A–Cu3<sup>4</sup> 2.748(7), Cu2A–Cu4A<sup>8</sup> 2.632(10), Cu3–Cu4A<sup>5</sup> 2.781(7), Cu1–S1A 2.459(3), Cu2A–S2A 2.346(8), Cu3–S3 2.2656(19), Cu4A–S4A 2.411(14), Cu1–I1 2.5519(13), Cu2A<sup>1</sup>–I1 2.645(7), Cu4A<sup>2</sup>–I1 2.668(4), Cu1<sup>3</sup>–I2 2.5911(16); Cu2A<sup>4</sup>–I2 2.648(6), Cu3–I2 2.6873(14), Cu2A<sup>4</sup>–I3 2.763(5), Cu3–I3 2.6909(13), Cu4A<sup>5</sup>–I3 2.734(4), Cu1<sup>6</sup>–I4 2.6984(16), Cu3<sup>7</sup>–I4 2.7183(15), Cu4A–I4 2.655(4); Cu1–I1–Cu2A<sup>1</sup> 68.55(14), Cu1–I1–Cu4A<sup>2</sup> 68.06(13), Cu2A<sup>1</sup>–I1–Cu4A<sup>2</sup> 59.1(2), Cu1<sup>4</sup>–I2–Cu2A<sup>3</sup> 67.94(15), Cu1<sup>4</sup>–I2–Cu3 73.94(4), Cu2A<sup>3</sup>–I2–Cu3 60.00(15), Cu2A<sup>3</sup>–I3–Cu3 60.50(14), Cu2A<sup>3</sup>–I3–Cu4A<sup>5</sup> 57.2(2), Cu4A<sup>5</sup>–I3–Cu3 61.47(14), Cu1<sup>7</sup>–I4–Cu4A 66.47(13), Cu1<sup>7</sup>–I4–Cu3<sup>6</sup> 71.77(4), S1A–Cu1–I1 117.52(7), S1A–Cu1–I2<sup>4</sup> 102.66(8), S1A–Cu1–I4<sup>3</sup> 102.66(8), S2A–Cu2A–I1<sup>8</sup> 106.6(3), S2A–Cu2A–I2<sup>3</sup> 127.0(3), S2A–Cu2A–I3<sup>3</sup> 88.2(2), S3–Cu3–I2 113.66(5), S3–Cu3–I3 113.28(5), S3–Cu3–I4<sup>5</sup> 100.32(6), S4A–Cu4A–I1<sup>7</sup> 106.1(4), S4A–Cu4A–I3<sup>6</sup> 95.3(4), S4A–Cu4A–I4 119.6(4). Symmetry transformations used to generate equivalent atoms: <sup>1</sup>+x, 1–y, 1/2+z; <sup>2</sup>1/2+x, 1/2+y, +z; <sup>3</sup>1–x, +y, 3/2–z; <sup>4</sup>1–x, 1–y, 1–z; <sup>5</sup>3/2–x, 1/2+y, 3/2–z, <sup>6</sup>1/2+–x, –1/2+y, +z, <sup>7</sup>3/2–x, 1/2+y, 3/2–z, <sup>8</sup>–1/2+x, 1/2–y, –1/2+z.

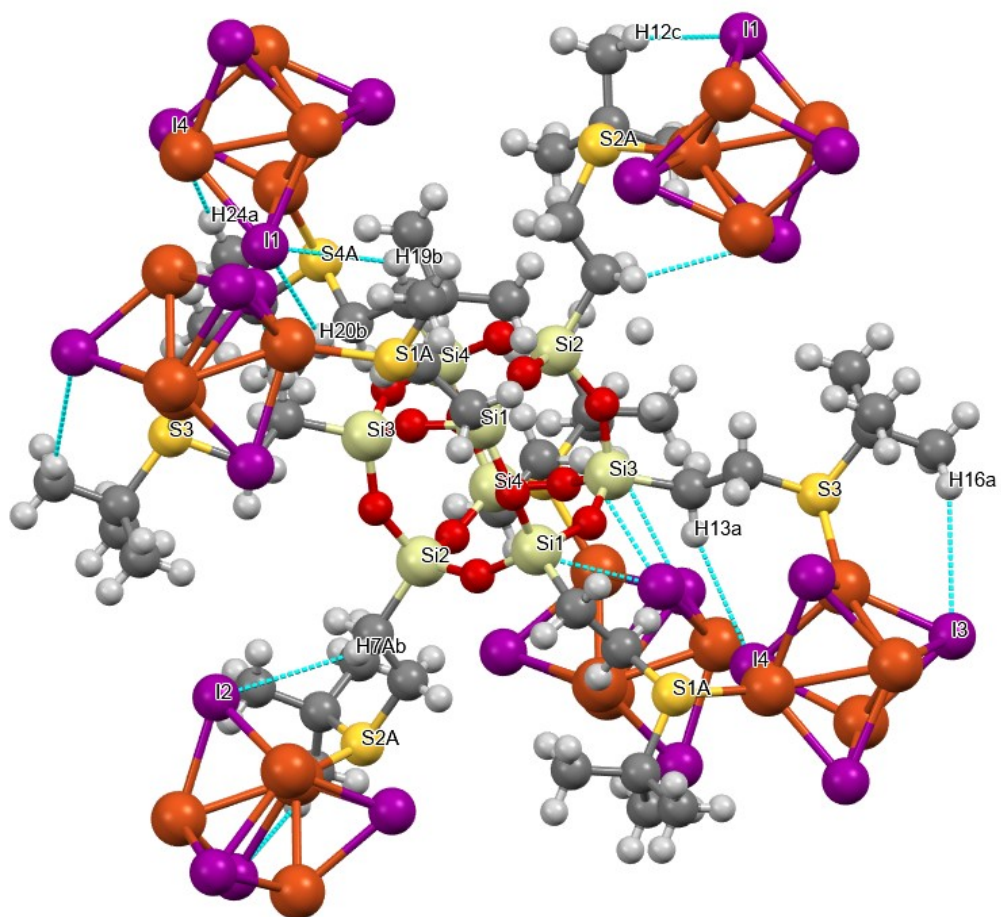

**Figure S17.** Hydrogen bonding in CP1.

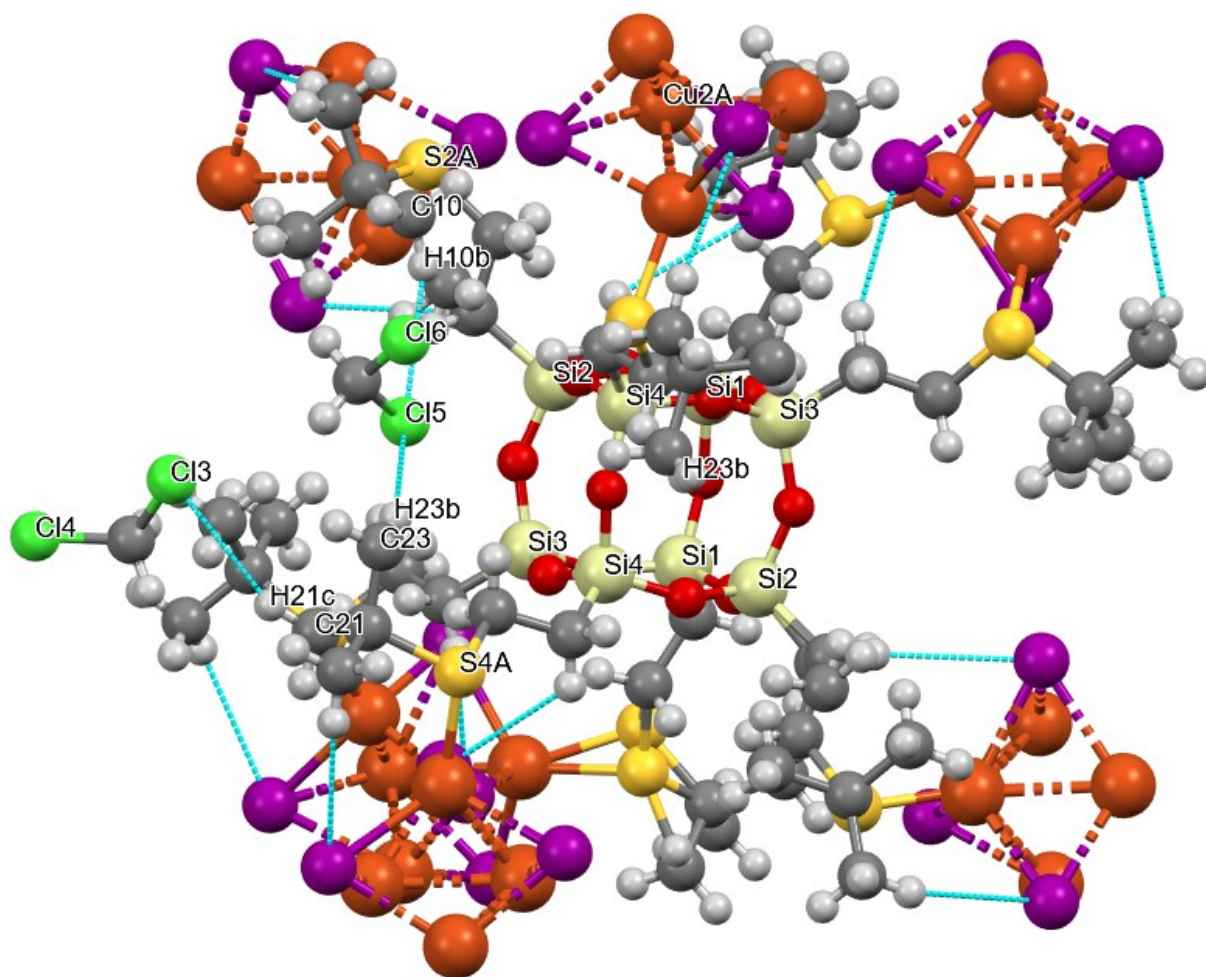

**Figure S18.** Hydrogen bonding in CP1.CH<sub>2</sub>Cl<sub>2</sub>.

**Table S3.** Comparison of geometrical parameters for the hydrogen-bonding interactions in CP1, CP1.CH<sub>2</sub>Cl<sub>2</sub>.

|                                         | interaction    | distance/Å |       |       | angle/deg |
|-----------------------------------------|----------------|------------|-------|-------|-----------|
|                                         |                | D-H        | H···A | D···A | D-H···A   |
| <b>CP1</b>                              | C12–H12C···I1  | 0.980      | 3.173 | 4.106 | 159.63    |
|                                         | C7–H7A···I2    | 0.989      | 3.206 | 3.868 | 125.73    |
|                                         | C16–H16a···I3  | 0.979      | 3.231 | 4.100 | 148.85    |
|                                         | C13–H13a···I4  | 0.990      | 3.156 | 4.047 | 150.43    |
|                                         | C19–H19b···I1  | 0.990      | 3.200 | 3.877 | 127.00    |
|                                         | C24–H24a···I4  | 0.981      | 3.177 | 4.114 | 160.46    |
|                                         | C20–H20b···I1  | 0.991      | 3.184 | 3.790 | 120.91    |
| <b>CP1.CH<sub>2</sub>Cl<sub>2</sub></b> | C12–H12C···I1  | 0.980      | 3.057 | 4.001 | 162.13    |
|                                         | C7A–H7A···I2   | 0.989      | 3.128 | 3.873 | 133.22    |
|                                         | C16–H16a···I3  | 0.980      | 3.193 | 3.999 | 140.56    |
|                                         | C13–H13a···I4  | 0.990      | 3.062 | 3.995 | 148.56    |
|                                         | C19–H19b···I1  | 0.990      | 3.142 | 3.834 | 128.17    |
|                                         | C24–H24a···I4  | 0.978      | 3.129 | 4.067 | 161.04    |
|                                         | C20–H20b···I1  | -          | -     | -     | -         |
|                                         | C10–H10b···Cl5 | 0.972      | 2.909 | 3.788 | 150.17    |
|                                         | C23–H23b···Cl5 | 0.980      | 2.854 | 3.817 | 167.59    |
|                                         | C21–H21c···Cl3 | 0.982      | 2.943 | 3.876 | 159.05    |

**Table S4.** Crystal data, data collection, and structure refinement for **L** and **CP2** at 100K.

| Compound                                   | <b>L</b>                                                         | <b>CP2</b>                                                        |
|--------------------------------------------|------------------------------------------------------------------|-------------------------------------------------------------------|
| CCDC number                                | 2540788                                                          | 2540789                                                           |
| Formula                                    | $C_{48}H_{104}O_{12}S_8Si_8$                                     | $C_{48}H_{104}Cu_5I_5O_{12}S_8Si_8$                               |
| Formula weight                             | 1354.51                                                          | 2306.71                                                           |
| Temperature [K]                            | 290.0                                                            | 100.00                                                            |
| Crystal system                             | 0.71073                                                          | 0.71073                                                           |
| Space group                                | Triclinic                                                        | Triclinic                                                         |
| $a$ [Å]                                    | $P\bar{1}$                                                       | $P\bar{1}$                                                        |
| $b$ [Å]                                    | 12.4593(8)                                                       | 13.633(6)                                                         |
| $c$ [Å]                                    | 13.1453(8)                                                       | 17.896(5)                                                         |
| $\alpha$ [°]                               | 13.2020(9)                                                       | 18.226(9)                                                         |
| $\beta$ [°]                                | 94.590(2)                                                        | 76.982(15)                                                        |
| $\gamma$ [°]                               | 106.477(2)                                                       | 81.072(16)                                                        |
| Volume/ Å <sup>3</sup>                     | 109.748(2)                                                       | 81.091(11)                                                        |
| $Z$                                        | 1914.1(2)                                                        | 4246(3)                                                           |
| $\rho_{\text{calc.}}$ [g/cm <sup>3</sup> ] | 1.175                                                            | 1.804                                                             |
| $\mu$ [mm <sup>-1</sup> ]                  | 0.405                                                            | 3.405                                                             |
| $F(000)$                                   | 728.0                                                            | 2276.0                                                            |
| Crystal size [mm]                          | 0.494×0.356×0.074                                                | 0.147× 0.1×0.082                                                  |
| Radiation                                  | Mo $K\alpha_1$<br>( $\lambda=0.71073$ Å)                         | Mo $K\alpha_1$<br>( $\lambda=0.71073$ Å)                          |
| $2\theta$ range [°]                        | 4.748 to 52.878                                                  | 3.612 to 52                                                       |
| Index ranges                               | -15 ≤ $h$ ≤ 15,<br>-16 ≤ $k$ ≤ 16,<br>-16 ≤ $l$ ≤ 16             | -16 ≤ $h$ ≤ 16,<br>-22 ≤ $k$ ≤ 21,<br>-22 ≤ $l$ ≤ 22              |
| Reflections collected                      | 41798                                                            | 80941                                                             |
| Independent reflections                    | 7809<br>$R_{\text{int}} = 0.0233$<br>$R_{\text{sigma}} = 0.0165$ | 16684<br>$R_{\text{int}} = 0.0526$<br>$R_{\text{sigma}} = 0.0397$ |
| Data / restraints / parameters             | 7809/78/388                                                      | 16684/0/843                                                       |
| Goodness-of-fit on $F^2$                   | 1.074                                                            | 1.049                                                             |
| Final $R$ indices [ $I > 2\sigma(I)$ ]     | $R_1 = 0.0558$ ,<br>$wR_2 = 0.1562$                              | $R_1 = 0.0375$<br>$wR_2 = 0.0839$                                 |
| $R$ indices (all data)                     | $R_1 = 0.0642$ ,<br>$wR_2 = 0.1641$                              | $R_1 = 0.0501$<br>$wR_2 = 0.0921$                                 |
| Largest peak/hole [e. Å <sup>-3</sup> ]    | 0.56/-0.53                                                       | 1.51/-1.33                                                        |

**Table S5.** Crystal data, data collection, and structure refinement for **CP1** at 100–300K.

| CCDC number                                                  | 2540066                                                                                                            | 2540067                                                                                                            | 2540068                                                                                                            | 2540069                                                                                                         | 2540070                                                                                                            | 2539835                                                                                                            | 2540071                                                                                                            | 2540072                                                                                                            |
|--------------------------------------------------------------|--------------------------------------------------------------------------------------------------------------------|--------------------------------------------------------------------------------------------------------------------|--------------------------------------------------------------------------------------------------------------------|-----------------------------------------------------------------------------------------------------------------|--------------------------------------------------------------------------------------------------------------------|--------------------------------------------------------------------------------------------------------------------|--------------------------------------------------------------------------------------------------------------------|--------------------------------------------------------------------------------------------------------------------|
| Formula                                                      | C <sub>24</sub> H <sub>51.79</sub> Cu <sub>4</sub> I <sub>4</sub> O <sub>6</sub> S <sub>4</sub><br>Si <sub>4</sub> | C <sub>24</sub> H <sub>51.77</sub> Cu <sub>4</sub> I <sub>4</sub> O <sub>6</sub> S <sub>4</sub><br>Si <sub>4</sub> | C <sub>24</sub> H <sub>51.75</sub> Cu <sub>4</sub> I <sub>4</sub> O <sub>6</sub> S <sub>4</sub><br>Si <sub>4</sub> | C <sub>24</sub> H <sub>51.72</sub> Cu <sub>4</sub> I <sub>4</sub> O <sub>6</sub> S <sub>4</sub> Si <sub>4</sub> | C <sub>24</sub> H <sub>51.74</sub> Cu <sub>4</sub> I <sub>4</sub> O <sub>6</sub> S <sub>4</sub><br>Si <sub>4</sub> | C <sub>24</sub> H <sub>51.73</sub> Cu <sub>4</sub> I <sub>4</sub> O <sub>6</sub> S <sub>4</sub><br>Si <sub>4</sub> | C <sub>24</sub> H <sub>51.73</sub> Cu <sub>4</sub> I <sub>4</sub> O <sub>6</sub> S <sub>4</sub><br>Si <sub>4</sub> | C <sub>24</sub> H <sub>51.75</sub> Cu <sub>4</sub> I <sub>4</sub> O <sub>6</sub> S <sub>4</sub><br>Si <sub>4</sub> |
| Formula weight                                               | 1438.872                                                                                                           | 1438.888                                                                                                           | 1438.834                                                                                                           | 1438.800                                                                                                        | 1438.821                                                                                                           | 1438.815                                                                                                           | 1438.807                                                                                                           | 1438.833                                                                                                           |
| Temperature [K]                                              | 100.00                                                                                                             | 130.00                                                                                                             | 160.00                                                                                                             | 190.00                                                                                                          | 220.00                                                                                                             | 250.00                                                                                                             | 280.00                                                                                                             | 300.00                                                                                                             |
| Crystal system                                               | monoclinic                                                                                                         | monoclinic                                                                                                         | monoclinic                                                                                                         | monoclinic                                                                                                      | monoclinic                                                                                                         | monoclinic                                                                                                         | monoclinic                                                                                                         | monoclinic                                                                                                         |
| Space group                                                  | C2/c                                                                                                               | C2/c                                                                                                               | C2/c                                                                                                               | C2/c                                                                                                            | C2/c                                                                                                               | C2/c                                                                                                               | C2/c                                                                                                               | C2/c                                                                                                               |
| <i>a</i> [Å]                                                 | 29.882(7)                                                                                                          | 29.821(8)                                                                                                          | 29.833(8)                                                                                                          | 29.847(8)                                                                                                       | 29.822(8)                                                                                                          | 29.824(9)                                                                                                          | 29.814(9)                                                                                                          | 29.930(9)                                                                                                          |
| <i>b</i> [Å]                                                 | 16.568(4)                                                                                                          | 16.572(4)                                                                                                          | 16.591(5)                                                                                                          | 16.600(4)                                                                                                       | 16.626(5)                                                                                                          | 16.629(5)                                                                                                          | 16.647(5)                                                                                                          | 16.683(5)                                                                                                          |
| <i>c</i> [Å]                                                 | 25.270(6)                                                                                                          | 25.239(7)                                                                                                          | 25.271(7)                                                                                                          | 25.280(7)                                                                                                       | 25.285(7)                                                                                                          | 25.274(8)                                                                                                          | 25.292(8)                                                                                                          | 25.314(8)                                                                                                          |
| $\alpha$ [°]                                                 | 90                                                                                                                 | 90                                                                                                                 | 90                                                                                                                 | 90                                                                                                              | 90                                                                                                                 | 90                                                                                                                 | 90                                                                                                                 | 90                                                                                                                 |
| $\beta$ [°]                                                  | 123.198(8)                                                                                                         | 123.039(8)                                                                                                         | 123.032(9)                                                                                                         | 122.980(9)                                                                                                      | 122.897(9)                                                                                                         | 122.823(9)                                                                                                         | 122.761(9)                                                                                                         | 122.716(9)                                                                                                         |
| $\gamma$ [°]                                                 | 90                                                                                                                 | 90                                                                                                                 | 90                                                                                                                 | 90                                                                                                              | 90                                                                                                                 | 90                                                                                                                 | 90                                                                                                                 | 90                                                                                                                 |
| Volume/ Å <sup>3</sup>                                       | 10469(4)                                                                                                           | 10456(5)                                                                                                           | 10487(5)                                                                                                           | 10507(5)                                                                                                        | 10526(5)                                                                                                           | 10533(5)                                                                                                           | 10556(6)                                                                                                           | 10634(6)                                                                                                           |
| <i>Z</i>                                                     | 8                                                                                                                  | 8                                                                                                                  | 8                                                                                                                  | 8                                                                                                               | 8                                                                                                                  | 8                                                                                                                  | 8                                                                                                                  | 8                                                                                                                  |
| $\rho$ calc. [g/cm <sup>3</sup> ]                            | 1.826                                                                                                              | 1.828                                                                                                              | 1.823                                                                                                              | 1.819                                                                                                           | 1.816                                                                                                              | 1.815                                                                                                              | 1.811                                                                                                              | 1.797                                                                                                              |
| $\mu$ [mm <sup>-1</sup> ]                                    | 4.243                                                                                                              | 4.249                                                                                                              | 4.236                                                                                                              | 4.228                                                                                                           | 4.220                                                                                                              | 4.217                                                                                                              | 4.208                                                                                                              | 4.177                                                                                                              |
| <i>F</i> (000)                                               | 5541.8                                                                                                             | 5541.9                                                                                                             | 5541.5                                                                                                             | 5541.2                                                                                                          | 5541.4                                                                                                             | 5541.4                                                                                                             | 5541.3                                                                                                             | 5541.5                                                                                                             |
| Crystal size [mm]                                            | 0.245×0.156×0.134                                                                                                  | 0.245×0.156×0.134                                                                                                  | 0.245×0.156×0.134                                                                                                  | 0.245×0.156×0.134                                                                                               | 0.245×0.156×0.134                                                                                                  | 0.245×0.156×0.134                                                                                                  | 0.245×0.156×0.134                                                                                                  | 0.245×0.156×0.134                                                                                                  |
| Radiation                                                    | $\lambda=0.71073$ Å                                                                                                | $\lambda=0.71073$ Å                                                                                                | $\lambda=0.71073$ Å                                                                                                | ( $\lambda=0.71073$ Å                                                                                           | $\lambda=0.71073$ Å                                                                                                | $\lambda=0.71073$ Å                                                                                                | $\lambda=0.71073$ Å                                                                                                | $\lambda=0.71073$ Å                                                                                                |
| 2 $\theta$ range [°]                                         | 3.98 to 58.96                                                                                                      | 3.98 to 59.12                                                                                                      | 3.84 to 59.12                                                                                                      | 3.96 to 59.16                                                                                                   | 3.96 to 55.86                                                                                                      | 3.96 to 55.14                                                                                                      | 3.96 to 54.24                                                                                                      | 3.94 to 52.86                                                                                                      |
| Index ranges                                                 | -41 ≤ <i>h</i> ≤ 37<br>-22 ≤ <i>k</i> ≤ 22<br>-25 ≤ <i>l</i> ≤ 34                                                  | -41 ≤ <i>h</i> ≤ 38<br>-22 ≤ <i>k</i> ≤ 22<br>-33 ≤ <i>l</i> ≤ 34                                                  | -41 ≤ <i>h</i> ≤ 38<br>-22 ≤ <i>k</i> ≤ 22<br>-33 ≤ <i>l</i> ≤ 35                                                  | -41 ≤ <i>h</i> ≤ 38<br>-22 ≤ <i>k</i> ≤ 22<br>-31 ≤ <i>l</i> ≤ 35                                               | -39 ≤ <i>h</i> ≤ 37<br>-21 ≤ <i>k</i> ≤ 21<br>-32 ≤ <i>l</i> ≤ 33                                                  | -38 ≤ <i>h</i> ≤ 37<br>-21 ≤ <i>k</i> ≤ 21<br>-32 ≤ <i>l</i> ≤ 32                                                  | -38 ≤ <i>h</i> ≤ 36<br>-21 ≤ <i>k</i> ≤ 21<br>-31 ≤ <i>l</i> ≤ 32                                                  | -37 ≤ <i>h</i> ≤ 36<br>-20 ≤ <i>k</i> ≤ 20<br>-23 ≤ <i>l</i> ≤ 31                                                  |
| Reflections collected                                        | 97756                                                                                                              | 111571                                                                                                             | 109763                                                                                                             | 88874                                                                                                           | 86308                                                                                                              | 84374                                                                                                              | 81302                                                                                                              | 45784                                                                                                              |
| Independent reflections                                      | 14493<br><i>R</i> <sub>int</sub> = 0.0674<br><i>R</i> <sub>sigma</sub> = 0.0408                                    | 14547<br><i>R</i> <sub>int</sub> = 0.0673<br><i>R</i> <sub>sigma</sub> = 0.0369                                    | 14585<br><i>R</i> <sub>int</sub> = 0.0644<br><i>R</i> <sub>sigma</sub> = 0.0354                                    | 14609<br><i>R</i> <sub>int</sub> = 0.0664<br><i>R</i> <sub>sigma</sub> = 0.0434                                 | 12475<br><i>R</i> <sub>int</sub> = 0.0668<br><i>R</i> <sub>sigma</sub> = 0.0381                                    | 12052<br><i>R</i> <sub>int</sub> = 0.0691<br><i>R</i> <sub>sigma</sub> = 0.0398                                    | 11583<br><i>R</i> <sub>int</sub> = 0.0783<br><i>R</i> <sub>sigma</sub> = 0.0441                                    | 10824<br><i>R</i> <sub>int</sub> = 0.0887<br><i>R</i> <sub>sigma</sub> = 0.0704                                    |
| Data / restraints / parameters                               | 14493/18/584                                                                                                       | 14547/18/590                                                                                                       | 14585/18/577                                                                                                       | 14609/24/577                                                                                                    | 12475/18/529                                                                                                       | 12052/18/58                                                                                                        | 11583/18/578                                                                                                       | 10824/18/576                                                                                                       |
| Goodness-of-fit on <i>F</i> <sup>2</sup>                     | 1.039                                                                                                              | 1.040                                                                                                              | 1.054                                                                                                              | 1.043                                                                                                           | 1.049                                                                                                              | 1.057                                                                                                              | 1.057                                                                                                              | 1.051                                                                                                              |
| Final <i>R</i> indices [ <i>I</i> > 2 $\sigma$ ( <i>I</i> )] | <i>R</i> <sub>1</sub> = 0.0423<br><i>wR</i> <sub>2</sub> = 0.0964                                                  | <i>R</i> <sub>1</sub> = 0.0419<br><i>wR</i> <sub>2</sub> = 0.1004                                                  | <i>R</i> <sub>1</sub> = 0.0430<br><i>wR</i> <sub>2</sub> = 0.1113                                                  | <i>R</i> <sub>1</sub> = 0.0468<br><i>wR</i> <sub>2</sub> = 0.1096                                               | <i>R</i> <sub>1</sub> = 0.0490<br><i>wR</i> <sub>2</sub> = 0.1261                                                  | <i>R</i> <sub>1</sub> = 0.0470<br><i>wR</i> <sub>2</sub> = 0.1176                                                  | <i>R</i> <sub>1</sub> = 0.0511<br><i>wR</i> <sub>2</sub> = 0.1314                                                  | <i>R</i> <sub>1</sub> = 0.0635<br><i>wR</i> <sub>2</sub> = 0.1593                                                  |
| <i>R</i> indices (all data)                                  | <i>R</i> <sub>1</sub> = 0.0599<br><i>wR</i> <sub>2</sub> = 0.1062                                                  | <i>R</i> <sub>1</sub> = 0.0605<br><i>wR</i> <sub>2</sub> = 0.1115                                                  | <i>R</i> <sub>1</sub> = 0.0645<br><i>wR</i> <sub>2</sub> = 0.1276                                                  | <i>R</i> <sub>1</sub> = 0.0768<br><i>wR</i> <sub>2</sub> = 0.1264                                               | <i>R</i> <sub>1</sub> = 0.0760<br><i>wR</i> <sub>2</sub> = 0.1454                                                  | <i>R</i> <sub>1</sub> = 0.0778<br><i>wR</i> <sub>2</sub> = 0.1376                                                  | <i>R</i> <sub>1</sub> = 0.0890<br><i>wR</i> <sub>2</sub> = 0.1568                                                  | <i>R</i> <sub>1</sub> = 0.1286<br><i>wR</i> <sub>2</sub> = 0.2018                                                  |
| Largest peak/hole [e. Å <sup>-3</sup> ]                      | 2.21/-1.18                                                                                                         | 1.82/-1.13                                                                                                         | 1.93/-1.17                                                                                                         | 1.62/-1.16                                                                                                      | 1.41/-1.16                                                                                                         | 1.26/-1.07                                                                                                         | 1.26/-0.97                                                                                                         | 1.28/-1.21                                                                                                         |

**Table S6.** Crystal data, data collection, and structure refinement for **CP1.CH<sub>2</sub>Cl<sub>2</sub>** at 100-250K and **CP1.CH<sub>2</sub>Br<sub>2</sub>** at 100K

| Internal reference                                          | CP1.CH <sub>2</sub> Cl <sub>2</sub>                                                                                                     | CP1.CH <sub>2</sub> Cl <sub>2</sub>                                                                                         | CP1.CH <sub>2</sub> Cl <sub>2</sub>                                                                                                     | CP1.CH <sub>2</sub> Cl <sub>2</sub>                                                                                                      | CP1.CH <sub>2</sub> Cl <sub>2</sub>                                                                                                      | CP1.CH <sub>2</sub> Cl <sub>2</sub>                                                                                                     | CP1.CH <sub>2</sub> Br <sub>2</sub>                                                                                                        |
|-------------------------------------------------------------|-----------------------------------------------------------------------------------------------------------------------------------------|-----------------------------------------------------------------------------------------------------------------------------|-----------------------------------------------------------------------------------------------------------------------------------------|------------------------------------------------------------------------------------------------------------------------------------------|------------------------------------------------------------------------------------------------------------------------------------------|-----------------------------------------------------------------------------------------------------------------------------------------|--------------------------------------------------------------------------------------------------------------------------------------------|
| CCDC number                                                 | 2540793                                                                                                                                 | 2539831                                                                                                                     | 2539832                                                                                                                                 | 2539833                                                                                                                                  | 2539834                                                                                                                                  | 2539836                                                                                                                                 | 2540790                                                                                                                                    |
| Formula                                                     | C <sub>25.12</sub> H <sub>54.04</sub> Cl <sub>2.3</sub> Cu <sub>4</sub> I <sub>4</sub> O <sub>6</sub><br>S <sub>4</sub> Si <sub>4</sub> | C <sub>25.12</sub> H <sub>53.99</sub> Cl <sub>2.27</sub> Cu<br>I <sub>4</sub> O <sub>6</sub> S <sub>4</sub> Si <sub>4</sub> | C <sub>25.12</sub> H <sub>53.97</sub> Cl <sub>2.3</sub> Cu <sub>4</sub> I <sub>4</sub><br>O <sub>6</sub> S <sub>4</sub> Si <sub>4</sub> | C <sub>25.12</sub> H <sub>54.05</sub> Cl <sub>2.31</sub> Cu <sub>4</sub> I <sub>4</sub><br>O <sub>6</sub> S <sub>4</sub> Si <sub>4</sub> | C <sub>25.12</sub> H <sub>54.06</sub> Cl <sub>2.47</sub> Cu <sub>4</sub> I <sub>4</sub><br>O <sub>6</sub> S <sub>4</sub> Si <sub>4</sub> | C <sub>25.12</sub> H <sub>52.97</sub> Cl <sub>2.2</sub> Cu <sub>4</sub> I <sub>4</sub><br>O <sub>6</sub> S <sub>4</sub> Si <sub>4</sub> | C <sub>25.08</sub> H <sub>50.26</sub> Br <sub>2.17</sub> Cu <sub>4</sub> I<br>I <sub>4</sub> O <sub>6</sub> S <sub>4</sub> Si <sub>4</sub> |
| Formula weight                                              | 1536.056                                                                                                                                | 1535.060                                                                                                                    | 1535.874                                                                                                                                | 1536.493                                                                                                                                 | 1542.358                                                                                                                                 | 1531.420                                                                                                                                | 1623.433                                                                                                                                   |
| Temperature [K]                                             | 100.00                                                                                                                                  | 130.00                                                                                                                      | 160.00                                                                                                                                  | 190.00                                                                                                                                   | 220.00                                                                                                                                   | 250.00                                                                                                                                  | 100.00                                                                                                                                     |
| Crystal system                                              | monoclinic                                                                                                                              | monoclinic                                                                                                                  | monoclinic                                                                                                                              | monoclinic                                                                                                                               | monoclinic                                                                                                                               | monoclinic                                                                                                                              | monoclinic                                                                                                                                 |
| Space group                                                 | C2/c                                                                                                                                    | C2/c                                                                                                                        | C2/c                                                                                                                                    | C2/c                                                                                                                                     | C2/c                                                                                                                                     | C2/c                                                                                                                                    | C2/c                                                                                                                                       |
| <i>a</i> [Å]                                                | 29.802(6)                                                                                                                               | 29.761(5)                                                                                                                   | 29.786(5)                                                                                                                               | 29.831(5)                                                                                                                                | 29.830(6)                                                                                                                                | 29.765(7)                                                                                                                               | 29.6754(14)                                                                                                                                |
| <i>b</i> [Å]                                                | 16.488(3)                                                                                                                               | 16.521(3)                                                                                                                   | 16.563(3)                                                                                                                               | 16.623(3)                                                                                                                                | 16.640(3)                                                                                                                                | 16.565(4)                                                                                                                               | 16.4757(8)                                                                                                                                 |
| <i>c</i> [Å]                                                | 25.250(5)                                                                                                                               | 25.196(4)                                                                                                                   | 25.217(4)                                                                                                                               | 25.247(4)                                                                                                                                | 25.230(5)                                                                                                                                | 25.135(6)                                                                                                                               | 26.5322(13)                                                                                                                                |
| $\alpha$ [°]                                                | 90                                                                                                                                      | 90                                                                                                                          | 90                                                                                                                                      | 90                                                                                                                                       | 90                                                                                                                                       | 90                                                                                                                                      | 90                                                                                                                                         |
| $\beta$ [°]                                                 | 122.666(5)                                                                                                                              | 122.669(5)                                                                                                                  | 122.619(5)                                                                                                                              | 122.561(6)                                                                                                                               | 122.587(7)                                                                                                                               | 122.948(7)                                                                                                                              | 127.2890(15)                                                                                                                               |
| $\gamma$ [°]                                                | 90                                                                                                                                      | 90                                                                                                                          | 90                                                                                                                                      | 90                                                                                                                                       | 90                                                                                                                                       | 90                                                                                                                                      | 90                                                                                                                                         |
| Volume [Å <sup>3</sup> ]                                    | 10445(4)                                                                                                                                | 10429(3)                                                                                                                    | 10478(3)                                                                                                                                | 10552(3)                                                                                                                                 | 10552(4)                                                                                                                                 | 10399(4)                                                                                                                                | 10320.6(9)                                                                                                                                 |
| <i>Z</i>                                                    | 8                                                                                                                                       | 8                                                                                                                           | 8                                                                                                                                       | 8                                                                                                                                        | 8                                                                                                                                        | 8                                                                                                                                       | 8                                                                                                                                          |
| $\rho_{\text{calc.}}$ [g/cm <sup>3</sup> ]                  | 1.954                                                                                                                                   | 1.955                                                                                                                       | 1.947                                                                                                                                   | 1.934                                                                                                                                    | 1.942                                                                                                                                    | 1.956                                                                                                                                   | 2.090                                                                                                                                      |
| $\mu$ [mm <sup>-1</sup> ]                                   | 4.373                                                                                                                                   | 4.379                                                                                                                       | 4.359                                                                                                                                   | 4.330                                                                                                                                    | 4.338                                                                                                                                    | 4.387                                                                                                                                   | 5.990                                                                                                                                      |
| <i>F</i> (000)                                              | 5928.9                                                                                                                                  | 5924.8                                                                                                                      | 5928.0                                                                                                                                  | 5930.6                                                                                                                                   | 5953.3                                                                                                                                   | 5906.5                                                                                                                                  | 6184.9                                                                                                                                     |
| Crystal size [mm]                                           | 0.269×0.147×0.104                                                                                                                       | 0.269×0.147×0.104                                                                                                           | 0.269×0.147×0.104                                                                                                                       | 0.269×0.147×0.104                                                                                                                        | 0.269×0.147×0.104                                                                                                                        | 0.269×0.147×0.104                                                                                                                       | 0.107×0.105×0.073                                                                                                                          |
| Radiation                                                   | Mo <i>K</i> $\alpha_1$<br>( $\lambda=0.71073$ Å)                                                                                        | Mo <i>K</i> $\alpha_1$<br>( $\lambda=0.71073$ Å)                                                                            | Mo <i>K</i> $\alpha_1$<br>( $\lambda=0.71073$ Å)                                                                                        | Mo <i>K</i> $\alpha_1$<br>( $\lambda=0.71073$ Å)                                                                                         | Mo <i>K</i> $\alpha_1$<br>( $\lambda=0.71073$ Å)                                                                                         | Mo <i>K</i> $\alpha_1$<br>( $\lambda=0.71073$ Å)                                                                                        | Mo <i>K</i> $\alpha_1$<br>( $\lambda=0.71073$ Å)                                                                                           |
| 2 $\theta$ range [°]                                        | 3.98 to 74.04                                                                                                                           | 3.98 to 61.26                                                                                                               | 3.96 to 61.3                                                                                                                            | 3.96 to 61.28                                                                                                                            | 3.96 to 59.56                                                                                                                            | 3.98 to 56.3                                                                                                                            | 2.96 to 60.12                                                                                                                              |
| Index ranges                                                | -50 ≤ <i>h</i> ≤ 50<br>-27 ≤ <i>k</i> ≤ 27<br>-42 ≤ <i>l</i> ≤ 42                                                                       | -42 ≤ <i>h</i> ≤ 42<br>-23 ≤ <i>k</i> ≤ 23<br>-35 ≤ <i>l</i> ≤ 36                                                           | -42 ≤ <i>h</i> ≤ 42<br>-23 ≤ <i>k</i> ≤ 23<br>-35 ≤ <i>l</i> ≤ 36                                                                       | -42 ≤ <i>h</i> ≤ 42<br>-23 ≤ <i>k</i> ≤ 23<br>-35 ≤ <i>l</i> ≤ 36                                                                        | -41 ≤ <i>h</i> ≤ 41<br>-21 ≤ <i>k</i> ≤ 23<br>-35 ≤ <i>l</i> ≤ 35                                                                        | -39 ≤ <i>h</i> ≤ 39<br>-21 ≤ <i>k</i> ≤ 21<br>-33 ≤ <i>l</i> ≤ 33                                                                       | -37 ≤ <i>h</i> ≤ 39<br>-20 ≤ <i>k</i> ≤ 21<br>-33 ≤ <i>l</i> ≤ 31                                                                          |
| Reflections collected                                       | 483228                                                                                                                                  | 158479                                                                                                                      | 159027                                                                                                                                  | 159963                                                                                                                                   | 102807                                                                                                                                   | 132259                                                                                                                                  | 212461                                                                                                                                     |
| Independent reflections                                     | 26512<br><i>R</i> <sub>int</sub> = 0.0713<br><i>R</i> <sub>sigma</sub> = 0.0246                                                         | 15995<br><i>R</i> <sub>int</sub> = 0.0608<br><i>R</i> <sub>sigma</sub> = 0.0284                                             | 16081<br><i>R</i> <sub>int</sub> = 0.0610<br><i>R</i> <sub>sigma</sub> = 0.0279                                                         | 16166<br><i>R</i> <sub>int</sub> = 0.0628<br><i>R</i> <sub>sigma</sub> = 0.0290                                                          | 14880<br><i>R</i> <sub>int</sub> = 0.0628<br><i>R</i> <sub>sigma</sub> = 0.0333                                                          | 12556<br><i>R</i> <sub>int</sub> = 0.0734<br><i>R</i> <sub>sigma</sub> = 0.0322                                                         | 12202<br><i>R</i> <sub>int</sub> = 0.0613<br><i>R</i> <sub>sigma</sub> = 0.0251                                                            |
| Data/restraints/parameters                                  | 26512/125/702                                                                                                                           | 15995/125/702                                                                                                               | 16081/125/701                                                                                                                           | 16166/137/690                                                                                                                            | 14880/125/702                                                                                                                            | 12556/125/708                                                                                                                           | 12202/417/613                                                                                                                              |
| Goodness-of-fit on <i>F</i> <sup>2</sup>                    | 1.011                                                                                                                                   | 1.041                                                                                                                       | 1.037                                                                                                                                   | 1.043                                                                                                                                    | 1.025                                                                                                                                    | 1.035                                                                                                                                   | 1.030                                                                                                                                      |
| Final <i>R</i> indices [ <i>I</i> >2 $\sigma$ ( <i>I</i> )] | <i>R</i> <sub>1</sub> = 0.0401<br><i>wR</i> <sub>2</sub> = 0.1096                                                                       | <i>R</i> <sub>1</sub> = 0.0441<br><i>wR</i> <sub>2</sub> = 0.1194                                                           | <i>R</i> <sub>1</sub> = 0.0444<br><i>wR</i> <sub>2</sub> = 0.1245                                                                       | <i>R</i> <sub>1</sub> = 0.0464<br><i>wR</i> <sub>2</sub> = 0.1298                                                                        | <i>R</i> <sub>1</sub> = 0.0481<br><i>wR</i> <sub>2</sub> = 0.1419                                                                        | <i>R</i> <sub>1</sub> = 0.0483<br><i>wR</i> <sub>2</sub> = 0.1424                                                                       | <i>R</i> <sub>1</sub> = 0.0558<br><i>wR</i> <sub>2</sub> = 0.1691                                                                          |
| <i>R</i> indices (all data)                                 | <i>R</i> <sub>1</sub> = 0.0595<br><i>wR</i> <sub>2</sub> = 0.1217                                                                       | <i>R</i> <sub>1</sub> = 0.0621<br><i>wR</i> <sub>2</sub> = 0.1323                                                           | <i>R</i> <sub>1</sub> = 0.0644<br><i>wR</i> <sub>2</sub> = 0.1396                                                                       | <i>R</i> <sub>1</sub> = 0.0704<br><i>wR</i> <sub>2</sub> = 0.1477                                                                        | <i>R</i> <sub>1</sub> = 0.0729<br><i>wR</i> <sub>2</sub> = 0.1618                                                                        | <i>R</i> <sub>1</sub> = 0.0746<br><i>wR</i> <sub>2</sub> = 0.1639                                                                       | <i>R</i> <sub>1</sub> = 0.0702<br><i>wR</i> <sub>2</sub> = 0.1807                                                                          |
| Largest peak/hole [e. Å <sup>-3</sup> ]                     | 2.19/-2.04                                                                                                                              | 1.76/-1.98                                                                                                                  | 1.41/-1.64                                                                                                                              | 1.65/-1.72                                                                                                                               | 2.35/-1.14                                                                                                                               | 1.10/-0.96                                                                                                                              | 4.22/-1.16                                                                                                                                 |

**Table S7.** Evolution of the Cu–Cu distances (Å), volumes of Cu4 tetrahedra (Å<sup>3</sup>) and volumes of the unit cells (Å<sup>3</sup>) with temperature (K) for **CP1**.

| T(K)                           | 100        | 130        | 160      | 190      | 220      | 250      | 280      | 300      |
|--------------------------------|------------|------------|----------|----------|----------|----------|----------|----------|
| Cu1–Cu2A                       | 2.7871(18) | 2.7920(19) | 2.805(2) | 2.826(3) | 2.831(3) | 2.845(2) | 2.857(2) | 2.875(3) |
| Cu1–Cu3                        | 3.171(1)   | 3.173(1)   | 3.178(1) | 3.181(1) | 3.189(2) | 3.193(2) | 3.203(2) | 3.204(3) |
| Cu1–Cu4A                       | 3.014(2)   | 3.016(3)   | 3.019(3) | 3.026(3) | 3.043(6) | 3.032(3) | 3.041(3) | 3.048(3) |
| Cu2A–Cu3                       | 2.747(2)   | 2.755(3)   | 2.766(3) | 2.788(3) | 2.793(5) | 2.821(3) | 2.837(3) | 2.857(4) |
| Cu2A–Cu4A                      | 2.750(3)   | 2.758(3)   | 2.768(4) | 2.793(4) | 2.805(7) | 2.820(4) | 2.837(4) | 2.852(6) |
| Cu3–Cu4A                       | 2.963(2)   | 2.965(3)   | 2.973(3) | 2.980(3) | 2.965(7) | 3.005(3) | 3.012(4) | 3.031(5) |
| <b>Mean(1-4)</b>               | 2.9053     | 2.9098     | 2.9182   | 2.9323   | 2.9383   | 2.9507   | 2.9645   | 2.9778   |
| <b>V<sub>(unit cell)</sub></b> | 10456(5)   | 10456(5)   | 10487(5) | 10507(5) | 10526(5) | 10533(5) | 10556(6) | 10634(6) |

**Table S8.** Evolution of the Cu–Cu distances (Å), volumes of Cu4 tetrahedra (Å<sup>3</sup>) and volumes of the unit cells (Å<sup>3</sup>) with temperature (K) for **CP1.CH<sub>2</sub>Cl<sub>2</sub>**.

| T(K)                           | 100        | 130        | 160        | 190        | 220       | 250       |
|--------------------------------|------------|------------|------------|------------|-----------|-----------|
| Cu1–Cu2A                       | 2.760(2)   | 2.768(3)   | 2.786(3)   | 2.789(4)   | 2.792(9)  | 2.812(7)  |
| Cu1–Cu3                        | 3.1319(8)  | 3.127(1)   | 3.130(1)   | 3.134(1)   | 3.134(1)  | 3.153(2)  |
| Cu1–Cu4A                       | 2.9275(13) | 2.9409(14) | 2.9570(14) | 2.9657(17) | 2.969(3)  | 2.985(3)  |
| Cu2A–Cu3                       | 2.761(3)   | 2.775(4)   | 2.792(4)   | 2.786(6)   | 2.729(16) | 2.765(11) |
| Cu2A–Cu4A                      | 2.730(3)   | 2.742(4)   | 2.765(4)   | 2.754(6)   | 2.704(15) | 2.731(12) |
| Cu3–Cu4A                       | 2.9790(16) | 2.9836(15) | 2.9851(12) | 2.9840(17) | 2.973(5)  | 2.973(4)  |
| <b>Mean(1-4)</b>               | 2.8816     | 2.8894     | 2.9025     | 2.9021     | 2.885     | 2.9031    |
| <b>V<sub>(unit cell)</sub></b> | 10445(4)   | 10429(3)   | 10478(3)   | 10552(3)   | 10552(4)  | 10399(4)  |
